# Supplementary material for: Nitrileimines as an alternative to azides in base-mediated click [3 + 2] cycloaddition with methylene active nitriles
Source: Royal Society of Chemistry journal article supplement (doi:10.1039/d0ra01417f), 2020-01-01

# Nitrileimines as an alternative to azides in base-mediated click [3+2]cycloaddition with methylene active nitriles

Mykola A. Tupychak, Olga Ya. Shyyka, Nazariy T. Pokhodylo, Mykola D. Obushak

Department of Organic Chemistry, Ivan Franko National University of Lviv,  
Kyryla i Mefodiya St. 6, Lviv 79005, Ukraine

## “Supporting Information”

**General Methods:**  $^1\text{H}$  and  $^{13}\text{C}$  NMR spectra were acquired on Varian Unity Plus 400 (400 and 101 MHz, respectively) and Bruker 170 Avance 500 (500 and 126 MHz, respectively) spectrometers in  $\text{DMSO-}d_6$  solutions using TMS or the deuterated solvent as internal reference. HPLC-MS analysis was performed by using an Agilent 1100 Series high performance liquid chromatograph equipped with a diode array and mass selective Agilent LC/MSD SL detector. The method of ionization was chemical ionization at atmospheric pressure. Elemental analysis was performed on an analyzer Carlo Erba 1106. Melting points were measured on a Boetius apparatus.

### General procedure for the synthesis of 2-(3-aryl-1,2,4-oxadiazol-5-yl)acetonitrile 1:

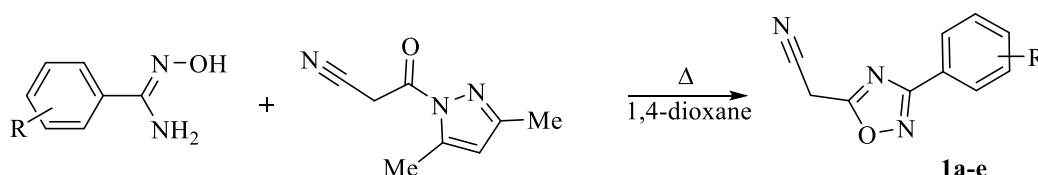

A mixture of equimolar amidoxime (10 mmol) and 3-(3,5-dimethyl-1H-pyrazol-1-yl)-3-oxopropanenitrile (1.63 g, 10 mmol) in 25 ml of dioxane was refluxed for 24 hours. Then cooled and dioxane was evaporated in vacuum. The residue was washed with  $\text{NaHCO}_3$  solution, filtered and dried yielding the target (1,2,4-oxadiazol-5-yl) acetonitrile **1**.

**2-(3-Phenyl-1,2,4-oxadiazol-5-yl)acetonitrile (1a)** was prepared as previously described by Pokhodylo N.T., Matychuk V.S. in *J. Heterocyclic Chem.* 2010 47, 415.

**2-(3-(o-Tolyl)-1,2,4-oxadiazol-5-yl)acetonitrile (1b):** Yield 1.65 g, 83%; yellow solid; m.p.: 77–78 °C;  $^1\text{H}$  NMR (500 MHz,  $\text{DMSO-}d_6$ ): 7.92 (d,  $J = 7.6$  Hz, 1H  $\text{H}^{\text{Ar-6}}$ ), 7.49 (t,  $J = 7.4$  Hz, 1H,  $\text{H}^{\text{Ar-5}}$ ), 7.44 – 7.35 (m, 2H,  $\text{H}^{\text{Ar-3,4}}$ ), 4.81 (s, 2H,  $\text{CH}_2$ ), 2.55 (s, 3H,  $\text{CH}_3$ ).  $^{13}\text{C}$  NMR (126 MHz,  $\text{DMSO-}d_6$ ): 171.12 ( $\text{C}^{\text{oxadiazole-5}}$ ), 169.03 ( $\text{C}^{\text{oxadiazole-3}}$ ), 138.10 ( $\text{C}^{\text{ToI-2}}$ ), 131.99 ( $\text{CH}^{\text{ToI-3}}$ ), 131.62 ( $\text{CH}^{\text{ToI-6}}$ ), 130.21 ( $\text{CH}^{\text{ToI-4}}$ ), 126.81 ( $\text{CH}^{\text{ToI-5}}$ ), 125.41 ( $\text{C}^{\text{ToI-1}}$ ), 114.92 (CN), 22.04 (Me), 17.50 ( $\text{CH}_2$ ). MS ( $m/z$ ): 200 ( $\text{M}^+ + 1$ ). Anal. calcd. for  $\text{C}_{11}\text{H}_9\text{N}_3\text{O}$ : C, 66.32; H, 4.55; N 21.09; found: C 66.33; H 4.53; N 21.05

**2-(3-(4-Fluorophenyl)-1,2,4-oxadiazol-5-yl)acetonitrile (1c):** Yield 1.54 g, 76%; yellow solid; m.p.: 62–63 °C;  $^1\text{H}$  NMR (400 MHz,  $\text{DMSO-}d_6$ ): 8.06 (dd,  $J = 8.5, 5.5$  Hz, 2H,  $\text{H}^{\text{Ar-2,6}}$ ), 7.41 (t,  $J = 8.8$  Hz, 2H,  $\text{H}^{\text{Ar-3,5}}$ ), 4.79 (s, 2H,  $\text{CH}_2$ ).  $^{13}\text{C}$  NMR (126 MHz,  $\text{DMSO-}d_6$ ): 172.33 ( $\text{C}^{\text{oxadiazole-5}}$ ), 167.67 ( $\text{C}^{\text{oxadiazole-3}}$ ), 164.61 (d,  $^1\text{J}_{\text{C-F}} = 249.8$  Hz,  $\text{C}^{\text{Ar-4}}$ ), 130.16 (d,  $^3\text{J}_{\text{C-F}} = 9.1$  Hz,  $2\times\text{CH}^{\text{Ar-2,6}}$ ), 122.61 (d,  $^4\text{J}_{\text{C-F}} = 3.1$  Hz,  $\text{C}^{\text{Ar-1}}$ ), 117.04 (d,  $^2\text{J}_{\text{C-F}} = 22.3$  Hz,  $2\times\text{CH}^{\text{Ar-3,5}}$ ), 114.83 (CN), 17.63 ( $\text{CH}_2$ ). MS ( $m/z$ ): 204 ( $\text{M}^+ + 1$ ). Anal. calcd. for  $\text{C}_{10}\text{H}_6\text{FN}_3\text{O}$ : C, 59.12; H, 2.98; N 20.68; found: C 59.13; H 2.95; N 20.69.

**2-(3-(2-Chlorophenyl)-1,2,4-oxadiazol-5-yl)acetonitrile (1d):** Yield 1.58 g, 72%; yellow solid; m.p.: 72–73 °C;  $^1\text{H}$  NMR (500 MHz,  $\text{DMSO-}d_6$ ): 7.92 (d,  $J = 7.5$  Hz, 1H,  $\text{H}^{\text{Ar-6}}$ ), 7.70 (d,  $J = 7.9$  Hz, 1H,  $\text{H}^{\text{Ar-3}}$ ), 7.63 (t,  $J = 7.5$  Hz, 1H,  $\text{H}^{\text{Ar-5}}$ ), 7.56 (t,  $J = 7.3$  Hz, 1H,  $\text{H}^{\text{Ar-4}}$ ), 4.84 (s, 2H,  $\text{CH}_2$ ).  $^{13}\text{C}$  NMR (101

MHz, DMSO-d<sub>6</sub>): 171.78 (C<sup>oxadiazole-5</sup>), 167.24 (C<sup>oxadiazole-3</sup>), 133.34 (CH<sup>Ar-3</sup>), 132.61 (C<sup>Ar-2</sup>), 132.25 (CH<sup>Ar-6</sup>), 131.41 (CH<sup>Ar-4</sup>), 128.26 (CH<sup>Ar-5</sup>), 125.32 (C<sup>Ar-1</sup>), 114.84 (CN), 17.59 (CH<sub>2</sub>). MS (m/z): 220 (M<sup>+</sup>+1). Anal. calcd. for C<sub>10</sub>H<sub>6</sub>ClN<sub>3</sub>O: C, 54.69; H, 2.75; N 19.13; found: C 54.67; H 2.76; N 19.11.

**2-(3-(4-Chlorophenyl)-1,2,4-oxadiazol-5-yl)acetonitrile (1e):** Yield 1.99 g, 91%; yellow solid; m.p.: 60–61 °C; <sup>1</sup>H NMR (500 MHz, DMSO-d<sub>6</sub>): 8.02 (d, J = 8.4 Hz, 2H, H<sup>Ar-2,6</sup>), 7.65 (d, J = 8.5 Hz, 2H, H<sup>Ar-3,5</sup>), 4.81 (s, 2H, CH<sub>2</sub>). <sup>13</sup>C NMR (126 MHz, DMSO-d<sub>6</sub>): 172.46 (C<sup>oxadiazole-5</sup>), 167.68 (C<sup>oxadiazole-3</sup>), 137.13 (C<sup>Ar-4</sup>), 130.02 (2xCH<sup>Ar-3,5</sup>), 129.35 (2xCH<sup>Ar-2,6</sup>), 124.89 (C<sup>Ar-1</sup>), 114.80 (CN), 17.66 (CH<sub>2</sub>). MS (m/z): 220 (M<sup>+</sup>+1). Anal. calcd. for C<sub>10</sub>H<sub>6</sub>ClN<sub>3</sub>O: C, 54.69; H, 2.75; N 19.13; found: C 54.70; H 2.74; N 19.12.

### General procedure for the synthesis of 5-amino-1*H*-pyrazole-3-carboxylates 4a-d, 7a-h and 1,2,3-triazoles 5a-e

A mixture of acetonitrile **1** (or oxopropanenitriles **6**) (2 mmol), chlorohydrazone **2** (2 mmol) [or azide **4** (2 mmol)], 5 mL MeOH, and sodium methoxide, that was prepared by dissolving 0.092 g (4 mmol) [or 0.046 g (2 mmol) in case of azides] sodium in 1 mL MeOH, was stirred at room temperature until the sediment was formed. The mixture monitoring by TLC. The resulting suspension was filtered and the solid product was washed with H<sub>2</sub>O and MeOH to give target pyrazole **4**, **7** [or triazoles **5**] as crystalline solid.

**Methyl 5-amino-4-(3-(4-fluorophenyl)-1,2,4-oxadiazol-5-yl)-1-(p-tolyl)-1*H*-pyrazole-3-carboxylate (4a):** Yield 0.68 g, 87%; white solid; m.p.: 167–168 °C; <sup>1</sup>H NMR (500 MHz, DMSO-d<sub>6</sub>): 8.18 (s, 2H, H<sup>Ar</sup>), 7.50 (d, J = 6.9 Hz, 2H, H<sup>Ar</sup>), 7.45 – 7.32 (m, 4H, H<sup>Ar</sup>), 6.86 (s, 2H, NH<sub>2</sub>), 3.89 (s, 3H, MeO), 2.40 (s, 3H, Me). <sup>13</sup>C NMR (126 MHz, DMSO-d<sub>6</sub>): 170.80 (C<sup>oxadiazole-5</sup>), 166.44 (C<sup>oxadiazole-3</sup>), 164.36 (d, <sup>1</sup>J<sub>C-F</sub> = 249.2 Hz, C<sup>Ar-4</sup>), 162.12 (O=C-O), 150.09 (C<sup>pyrazole-5</sup>), 140.99 (C<sup>pyrazole-3</sup>), 138.93 (C<sup>Tol-4</sup>), 134.89 (C<sup>Tol-1</sup>), 130.53 (2xCH<sup>Tol-3,5</sup>), 130.21 (d, <sup>3</sup>J<sub>C-F</sub> = 8.9 Hz, 2xCH<sup>Ar-2,6</sup>), 125.06 (2xCH<sup>Tol-2,6</sup>), 123.32 (d, <sup>4</sup>J = 2.7 Hz, C<sup>Ar-1</sup>), 116.66 (d, <sup>2</sup>J<sub>C-F</sub> = 22.1 Hz, 2xCH<sup>Ar-3,5</sup>), 87.89 (C<sup>pyrazole-4</sup>), 52.65 (OMe), 21.15 (Me). MS (m/z): 394 (M<sup>+</sup>+1). Anal. calcd. for C<sub>20</sub>H<sub>16</sub>FN<sub>5</sub>O<sub>3</sub>: C, 61.07; H, 4.10; N 17.80; found: C 61.09; H 4.05; N 17.85.

**Methyl 5-amino-4-(3-(4-chlorophenyl)-1,2,4-oxadiazol-5-yl)-1-(p-tolyl)-1*H*-pyrazole-3-carboxylate (4b):** Yield 0.74 g, 91%; dark orange solid; m.p.: 145–146 °C; <sup>1</sup>H NMR (400 MHz, DMSO-d<sub>6</sub>): 8.11 (br.s, 2H, H<sup>Ar</sup>), 7.60 (br.s, 2H, H<sup>Ar</sup>), 7.48 (br.s, 2H, H<sup>Ar</sup>), 7.39 (br.s, 2H, H<sup>Ar</sup>), 6.87 (s, 2H, NH<sub>2</sub>), 3.87 (s, 3H, MeO), 2.38 (s, 3H, Me). <sup>13</sup>C NMR (101 MHz, DMSO-d<sub>6</sub>): 170.89 (C<sup>oxadiazole-5</sup>), 166.46 (C<sup>oxadiazole-3</sup>), 162.15 (O=C-O), 150.14 (C<sup>pyrazole-5</sup>), 140.98 (C<sup>pyrazole-3</sup>), 138.95 (C<sup>Tol-4</sup>), 136.60 (C<sup>Ar-4</sup>), 134.92 (C<sup>Tol-1</sup>), 130.57 (2xCH<sup>Tol-3,5</sup>), 129.72 (2xCH<sup>Ar-3,5</sup>), 129.50 (2xCH<sup>Ar-2,6</sup>), 125.64 (C<sup>Ar-1</sup>), 125.07 (2xCH<sup>Tol-2,6</sup>), 87.76 (C<sup>pyrazole-4</sup>), 52.67 (OMe), 21.27 (Me). MS (m/z): 410 (M<sup>+</sup>+1). Anal. calcd. for C<sub>20</sub>H<sub>16</sub>ClN<sub>5</sub>O<sub>3</sub>: C, 58.61; H, 3.94; N 17.09; found: C 58.59; H 3.91; N 17.12.

**Methyl 5-amino-1-(4-chlorophenyl)-4-(3-phenyl-1,2,4-oxadiazol-5-yl)-1*H*-pyrazole-3-carboxylate (4c):** Yield 0.65 g, 82%; yellow solid; m.p.: 138–139 °C; <sup>1</sup>H NMR (500 MHz, DMSO-d<sub>6</sub>): 8.12 (br.s, 2H, H<sup>Ar</sup>), 7.67 (br.s, 4H, H<sup>Ar</sup>), 7.58 (br.s, 3H, H<sup>Ar</sup>), 7.01 (s, 2H, NH<sub>2</sub>), 3.89 (s, 3H, MeO). <sup>13</sup>C NMR (126 MHz, DMSO-d<sub>6</sub>): 170.64 (C<sup>oxadiazole-5</sup>), 167.26 (C<sup>oxadiazole-3</sup>), 162.04 (O=C-O), 150.30 (C<sup>pyrazole-5</sup>), 141.47 (C<sup>pyrazole-3</sup>), 136.26 (C<sup>Ar-1</sup>), 133.67 (C<sup>Ar-4</sup>), 131.88 (CH<sup>Ph-4</sup>), 130.11 (2xCH<sup>Ar-3,5</sup>), 129.55 (2xCH<sup>Ph-3,5</sup>), 127.69 (2xCH<sup>Ph-2,6</sup>), 127.08 (2xCH<sup>Ar-2,6</sup>), 126.73 (C<sup>Ph-1</sup>), 88.14 (C<sup>pyrazole-4</sup>), 52.73 (OMe). MS (m/z): 396 (M<sup>+</sup>+1). Anal. calcd. for C<sub>19</sub>H<sub>14</sub>ClN<sub>5</sub>O<sub>3</sub>: C, 57.66; H, 3.57; N 17.69; found: C 57.68; H 3.55; N 17.70.

**Methyl 5-amino-1-(4-chlorophenyl)-4-(3-(2-chlorophenyl)-1,2,4-oxadiazol-5-yl)-1H-pyrazole-3-carboxylate (4d):** Yield 0.64 g, 75%; white solid; m.p.: 151–152 °C; <sup>1</sup>H NMR (500 MHz, DMSO-d<sub>6</sub>):

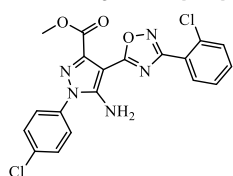

8.06 (d, J = 6.2 Hz, 1H, H<sup>Ar</sup>), 7.77 – 7.58 (m, 6H, H<sub>Ar</sub>), 7.55 (d, J = 6.5 Hz, 1H, H<sub>Ar</sub>), 6.97 (s, 2H, NH<sub>2</sub>), 3.90 (s, 3H, MeO). <sup>13</sup>C NMR (126 MHz, DMSO-d<sub>6</sub>): 170.21 (C<sup>oxadiazole-5</sup>), 166.11 (C<sup>oxadiazole-3</sup>), 162.00 (O=C-O), 150.48 (C<sup>pyrazole-5</sup>), 141.41 (C<sup>pyrazole-3</sup>), 136.23 (C<sup>Ar-1</sup>), 133.67 (C<sup>Ar-4</sup>), 132.92 (CH<sup>Ar-3</sup>), 132.61 (C<sup>Ar-2</sup>), 132.37 (CH<sup>Ar-4</sup>), 131.26 (CH<sup>Ar-6</sup>), 130.11 (2xCH<sup>Ar-3,5</sup>), 128.09 (CH<sup>Ar-5</sup>), 127.05 (2xCH<sup>Ar-2,6</sup>), 125.97 (C<sup>Ar-1</sup>), 87.90 (C<sup>pyrazole-4</sup>), 52.76 (OMe). MS (m/z): 430 (M<sup>+</sup>+1). Anal. calcd. for C<sub>19</sub>H<sub>13</sub>Cl<sub>2</sub>N<sub>5</sub>O<sub>3</sub>: C, 53.04; H, 3.05; N 16.28; found: C 53.01; H 3.03; N 16.30.

**Ethyl 5-amino-1-(4-bromophenyl)-4-(3-(o-tolyl)-1,2,4-oxadiazol-5-yl)-1H-pyrazole-3-carboxylate (4d):** Yield 0.88 g, 94%; yellow solid; m.p.: 163–164 °C; <sup>1</sup>H NMR (500 MHz, DMSO-d<sub>6</sub>):

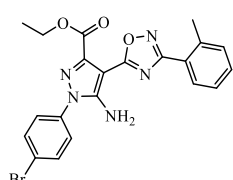

8.05 (d, J = 7.3 Hz, 1H, H<sup>Ar</sup>), 7.79 (d, J = 7.1 Hz, 2H, H<sup>Ar-2,6</sup>), 7.60 (d, J = 7.1 Hz, 2H, H<sup>Ar-3,5</sup>), 7.51 – 7.44 (m, 1H, H<sup>Ar</sup>), 7.39 (m, 2H, H<sup>Ar-4,5</sup>), 6.95 (s, 2H, NH<sub>2</sub>), 4.36 (q, J = 6.6 Hz, 2H, CH<sub>2</sub>O), 2.58 (s, 3H, CH<sub>3</sub>), 1.32 (t, J = 6.2 Hz, 3H, CH<sub>3</sub>). <sup>13</sup>C NMR (126 MHz, DMSO-d<sub>6</sub>): 169.75 (C<sup>oxadiazole-5</sup>), 167.91 (C<sup>oxadiazole-3</sup>), 161.69 (O=C-O), 150.17 (C<sup>pyrazole-5</sup>), 141.92 (C<sup>pyrazole-3</sup>), 137.96 (C<sup>Tol-2</sup>), 136.71 (C<sup>Ar-1</sup>), 133.09 (2xCH<sup>Ar-3,5</sup>), 131.86 (CH<sup>Tol-3</sup>), 131.25 (CH<sup>Tol-6</sup>), 130.42 (CH<sup>Tol-4</sup>), 127.40 (2xCH<sup>Ar-2,6</sup>), 126.70 (C<sup>Tol-1</sup>), 126.11 (C<sup>Tol-5</sup>), 122.18 (C<sup>Ar-4</sup>), 88.11 (C<sup>pyrazole-4</sup>), 61.70 (CH<sub>2</sub>O), 22.20 (Me), 14.51 (CH<sub>3</sub>). MS (m/z): 468, 470 (M<sup>+</sup>+1). Anal. calcd. for C<sub>21</sub>H<sub>18</sub>BrN<sub>5</sub>O<sub>3</sub>: C, 53.86; H, 3.87; N 14.95; found: C 53.89; H 3.85; N 14.90.

**Methyl 5-amino-4-[(1-methyl-1H-pyrrol-2-yl)carbonyl]-1-phenyl-1H-pyrazole-3-carboxylate (7a):** Yield 0.54 g, 84 %; white solid; m.p.: 153–154 °C; <sup>1</sup>H NMR (500 MHz, DMSO-d<sub>6</sub>):

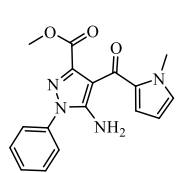

7.60–7.49 (m, 5H, Ph), 7.09 (s, 1H, H<sup>Pyr-5</sup>), 6.45 (br. s, 3H, H<sup>Pyr-3</sup> + NH<sub>2</sub>), 6.07 (br. s, 1H, H<sup>Pyr-4</sup>), 3.87 (s, 3H, Me), 3.49 (s, 3H, Me). <sup>13</sup>C-NMR (126 MHz, DMSO-d<sub>6</sub>): 179.55 (C=O), 163.50 (O=C-O), 150.28 (C<sup>pyrazole-5</sup>), 144.08 (C<sup>pyrazole-3</sup>), 137.66 (C<sup>Ph-1</sup>), 132.56 (C<sup>Pyr-2</sup>), 130.59 (CH<sup>Pyr-5</sup>), 130.00 (2xCH<sup>Ph-3,5</sup>), 128.73 (CH<sup>Ph-4</sup>), 124.72 (2xCH<sup>Ph-2,6</sup>), 117.81 (CH<sup>Pyr-3</sup>), 107.93 (CH<sup>Pyr-4</sup>), 104.25 (C<sup>pyrazole-4</sup>), 52.35 (OMe), 36.29 (MeN); MS (m/z): 325 (M<sup>+</sup>+1). Anal. calcd. for C<sub>17</sub>H<sub>16</sub>N<sub>4</sub>O<sub>3</sub>: C 62.95; H 4.97; N 17.27; found: C 62.97; H 4.94; N 17.25.

**Ethyl 5-amino-1-(4-chlorophenyl)-4-(1-methyl-1H-pyrrole-2-carbonyl)-1H-pyrazole-3-carboxylate (7b):** Yield 0.64 g, 86 %; white solid; m.p.: 139–140 °C; <sup>1</sup>H NMR (400 MHz, DMSO-d<sub>6</sub>):

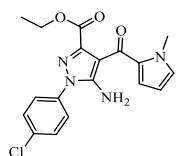

7.63 (br. s, 4H, H<sup>Ar</sup>), 7.09 (s, 1H, H<sup>Pyr-5</sup>), 6.50 (s, 2H, NH<sub>2</sub>), 6.39 (s, 1H, H<sup>Pyr-3</sup>), 6.05 (br. s, 1H, H<sup>Pyr-4</sup>), 3.99 – 3.72 (m, 5H, OCH<sub>2</sub> + Me), 0.91 (br. s, 3H, EtO). <sup>13</sup>C NMR (101 MHz, DMSO-d<sub>6</sub>): 179.62 (C=O), 162.92 (O=C-O), 150.57 (C<sup>pyrazole-5</sup>), 144.55 (C<sup>pyrazole-3</sup>), 136.57 (C<sup>Ar-1</sup>), 133.13 (C<sup>Ar-4</sup>), 132.77 (C<sup>Pyr-2</sup>), 130.54 (CH<sup>Pyr-5</sup>), 130.00 (2xCH<sup>Ar-3,5</sup>), 126.67 (2xCH<sup>Ar-2,6</sup>), 117.94 (CH<sup>Pyr-3</sup>), 108.00 (CH<sup>Pyr-4</sup>), 104.18 (C<sup>pyrazole-4</sup>), 61.11 (CH<sub>2</sub>O), 36.24 (MeN), 13.90 (CH<sub>3</sub>); MS (m/z): 373 (M<sup>+</sup>+1). Anal. calcd. for C<sub>18</sub>H<sub>17</sub>ClN<sub>4</sub>O<sub>3</sub>: C, 57.99; H, 4.60; N, 15.03; found: C 57.95; H 4.62; N 15.05.

**Ethyl 5-amino-1-(4-bromophenyl)-4-(1-methyl-1H-pyrrole-2-carbonyl)-1H-pyrazole-3-carboxylate (7c):** Yield 0.74 g, 89%; white solid; m.p.: 135–136 °C; <sup>1</sup>H NMR (500 MHz, DMSO-d<sub>6</sub>):

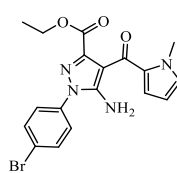

7.75 (d, J = 8.0 Hz, 2H, H<sup>Ar-2,6</sup>), 7.58 (d, J = 8.0 Hz, 2H, H<sup>Ar-3,5</sup>), 7.10 (br. s, 1H, H<sup>Pyr-5</sup>), 6.53 (s, 2H, NH<sub>2</sub>), 6.38 (br. s, 1H, H<sup>Pyr-3</sup>), 6.05 (br. s, 1H, H<sup>Pyr-4</sup>), 3.97 – 3.87 (m, 2H, CH<sub>2</sub>O), 3.85 (s, 3H, MeN), 0.90 (t, J = 6.8 Hz, 3H, CH<sub>3</sub>); <sup>13</sup>C NMR (126 MHz, DMSO-d<sub>6</sub>): 179.57 (C=O), 162.87 (O=C-O), 150.49 (C<sup>pyrazole-5</sup>), 144.55 (C<sup>pyrazole-3</sup>), 136.96 (C<sup>Ar-1</sup>), 132.89 (2xCH<sup>Ar-3,5</sup>), 132.72 (C<sup>Pyr-2</sup>), 130.53 (CH<sup>Pyr-5</sup>), 126.84 (2xCH<sup>Ar-2,6</sup>), 121.49 (C<sup>Ar-4</sup>), 117.91 (CH<sup>Pyr-3</sup>), 107.96 (CH<sup>Pyr-4</sup>), 104.19 (C<sup>pyrazole-4</sup>), 61.09 (CH<sub>2</sub>O), 36.22 (MeN), 13.88 (CH<sub>3</sub>). MS (m/z): 417, 419 (M<sup>+</sup>+1). Anal. calcd. for C<sub>18</sub>H<sub>17</sub>BrN<sub>4</sub>O<sub>3</sub>: C, 51.81; H, 4.11; N, 13.43; found: C 51.85; H 4.07; N 13.45.

**Methyl 5-amino-4-(1H-indol-3-ylcarbonyl)-1-phenyl-1H-pyrazole-3-carboxylate (7d):** Yield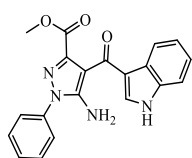

0.63 g, 87 %; white solid; m.p.: 143–144 °C; <sup>1</sup>H NMR (500 MHz, DMSO-d<sub>6</sub>): 11.85 (br. s, 1H, NH), 8.14 (d, J = 6.7 Hz, 1H, H<sup>Ind</sup>-7), 7.73 (s, 1H, H<sup>Ind</sup>-2), 7.66 (d, J = 6.9 Hz, 2H, H<sup>Ph</sup>-2,6), 7.61 (t, J = 7.1 Hz, 2H, H<sup>Ph</sup>-3,5), 7.53 – 7.47 (m, 2H, H<sup>Ph</sup>-4+H<sup>Ind</sup>-5), 7.26 – 7.18 (m, 2H, H<sup>Ind</sup>-5,6), 6.34 (br. s, 2H, NH<sub>2</sub>), 3.49 (s, 3H, MeO). <sup>13</sup>C NMR (126 MHz, DMSO-d<sub>6</sub>): 184.08 (C=O), 163.61 (O=C-O), 149.83 (C<sup>pyrazole</sup>-5), 143.26 (C<sup>pyrazole</sup>-3), 137.93 (C<sup>Ar</sup>-1), 137.03, 132.96, 130.02 (2xCH<sup>Ar</sup>-3,5), 128.70 (CH<sup>Ar</sup>-4), 126.30, 124.73 (2xCH<sup>Ar</sup>-2,6), 123.13, 121.74, 121.52, 118.08, 112.57, 105.34 (C<sup>pyrazole</sup>-4), 52.17 (OMe). MS (m/z): 361 (M<sup>+</sup>+1). Anal. calcd. for C<sub>20</sub>H<sub>16</sub>N<sub>4</sub>O<sub>3</sub>: C 66.66; H 4.48; N 15.55; found: C 66.43; H 4.37; N 15.63.

**Ethyl 5-amino-4-(1H-indole-3-carbonyl)-1-(p-tolyl)-1H-pyrazole-3-carboxylate (7e):** Yield 0.74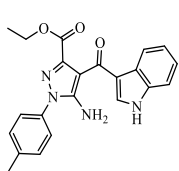

g, 96 %; white solid; m.p.: 227–228 °C; <sup>1</sup>H NMR (400 MHz, DMSO-d<sub>6</sub>): 11.80 (br. s, 1H, NH), 8.09 (d, J = 7.3 Hz, 1H, H<sup>Ind</sup>-7), 7.68 (br. s, 1H, H<sup>Ind</sup>-2), 7.51 (d, J = 7.8 Hz, 2H, H<sup>Ar</sup>-2,6), 7.47 (d, J = 7.7 Hz, 1H, H<sup>Ind</sup>-4), 7.38 (d, J = 7.7 Hz, 2H, H<sup>Ar</sup>-3,5), 7.25 – 7.14 (m, 2H, H<sup>Ind</sup>-5,6), 6.28 (s, 2H, NH<sub>2</sub>), 3.87 (q, J = 6.8 Hz, 2H, CH<sub>2</sub>O), 2.40 (s, 3H, Me), 0.76 (t, J = 6.9 Hz, 3H, CH<sub>3</sub>). <sup>13</sup>C NMR (126 MHz, DMSO-d<sub>6</sub>): 184.29 (C=O), 163.20 (O=C-O), 149.88 (C<sup>pyrazole</sup>-5), 143.44 (C<sup>pyrazole</sup>-3), 138.31 (C<sup>Tol</sup>-4), 136.98, 135.39 (C<sup>Tol</sup>-1), 132.67, 130.44 (2xCH<sup>Tol</sup>-3,5), 126.25, 124.70 (2xCH<sup>Tol</sup>-2,6), 123.14, 121.71, 121.40, 118.40, 112.52, 105.05 (C<sup>pyrazole</sup>-4), 61.01 (CH<sub>2</sub>O), 21.17 (CH<sub>3</sub>), 13.77 (CH<sub>3</sub>). MS (m/z): 389 (M<sup>+</sup>+1). Anal. calcd. for C<sub>22</sub>H<sub>20</sub>N<sub>4</sub>O<sub>3</sub>: C, 68.03; H, 5.19; N, 14.42; found: C 68.05; H 5.17; N 14.43.

**Ethyl 5-amino-1-(4-chlorophenyl)-4-(1H-indole-3-carbonyl)-1H-pyrazole-3-carboxylate (7f):** Yield 0.75 g, 92%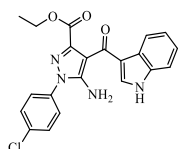

Yield 0.75 g, 92%; white solid; m.p.: 219–220 °C; <sup>1</sup>H NMR (400 MHz, DMSO-d<sub>6</sub>): 12.03 (br. s, 1H, NH), 8.09 (d, J = 7.4 Hz, 1H, H<sup>Ind</sup>-7), 7.71 – 7.65 (m, 3H, H<sup>Ind</sup>-2 + H<sup>Ar</sup>-2,6), 7.63 (d, J = 8.6 Hz, 2H, H<sup>Ar</sup>-3,5), 7.48 (d, J = 7.4 Hz, 1H, H<sup>Ind</sup>-4), 7.27 – 7.12 (m, 2H, H<sup>Ind</sup>-5,6), 6.40 (s, 2H, NH<sub>2</sub>), 3.89 (q, J = 6.8 Hz, 2H, CH<sub>2</sub>O), 0.77 (t, J = 7.0 Hz, 3H, CH<sub>3</sub>). <sup>13</sup>C NMR (101 MHz, DMSO-d<sub>6</sub>): 184.15 (C=O), 163.06 (O=C-O), 150.01 (C<sup>pyrazole</sup>-5), 143.88 (C<sup>pyrazole</sup>-3), 137.05, 136.80 (C<sup>Ar</sup>-1), 133.00 (C<sup>Ar</sup>-4), 132.84, 129.99 (2xCH<sup>Ar</sup>-3,5), 126.60 (2xCH<sup>Ar</sup>-2,6), 126.25, 123.13, 121.73, 121.39, 118.29, 112.62, 105.32 (C<sup>pyrazole</sup>-4), 61.10 (CH<sub>2</sub>O), 13.80 (CH<sub>3</sub>). MS (m/z): 409 (M<sup>+</sup>+1). Anal. calcd. for C<sub>21</sub>H<sub>17</sub>ClN<sub>4</sub>O<sub>3</sub>: C, 61.69; H, 4.19; N, 13.70; found: C 61.67; H 4.20; N 13.71.

**Ethyl 5-amino-1-(4-bromophenyl)-4-(1H-indole-3-carbonyl)-1H-pyrazole-3-carboxylate (7g):** Yield 0.89 g, 97 %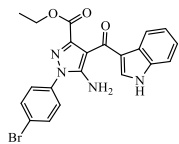

Yield 0.89 g, 97 %; white solid; m.p.: 223–224 °C; <sup>1</sup>H NMR (500 MHz, DMSO-d<sub>6</sub>): 12.03 (br. s, 1H, NH), 8.10 (d, J = 7.3 Hz, 1H, H<sup>Ind</sup>-7), 7.76 (d, J = 7.8 Hz, 2H, H<sup>Ar</sup>-2,6), 7.68 (br. s, 1H, H<sup>Ind</sup>-2), 7.62 (d, J = 7.8 Hz, 2H, H<sup>Ar</sup>-3,5), 7.49 (d, J = 7.4 Hz, 1H, H<sup>Ind</sup>-4), 7.27 – 7.10 (m, 2H, H<sup>Ind</sup>-5,6), 6.41 (s, 2H, NH<sub>2</sub>), 3.89 (q, J = 6.8 Hz, 2H, CH<sub>2</sub>O), 0.77 (t, J = 6.6 Hz, 3H, CH<sub>3</sub>). <sup>13</sup>C NMR (126 MHz, DMSO-d<sub>6</sub>): 184.11 (C=O), 163.01 (O=C-O), 149.94 (C<sup>pyrazole</sup>-5), 143.89 (C<sup>pyrazole</sup>-3), 137.19, 137.01 (C<sup>Ar</sup>-1), 132.88 (2xCH<sup>Ar</sup>-3,5), 132.78, 126.78 (2xCH<sup>Ar</sup>-2,6), 126.21, 123.09, 121.69, 121.39 (C<sup>Ar</sup>-4), 121.36, 118.27, 112.57, 105.33 (C<sup>pyrazole</sup>-4), 61.07 (CH<sub>2</sub>O), 13.77 (CH<sub>3</sub>). MS (m/z): 453, 455 (M<sup>+</sup>+1). Anal. calcd. for C<sub>21</sub>H<sub>17</sub>BrN<sub>4</sub>O<sub>3</sub>: C, 55.64; H, 3.78; N, 12.36; found: C 55.65; H 3.76; N 12.35.

**5-Amino-1-(4-fluorophenyl)-4-(1H-indole-3-carbonyl)-1H-pyrazole-3-carboxylic acid (7h):** Yield 0.57 g, 79%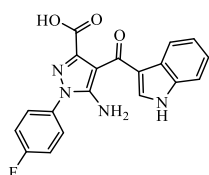

Yield 0.57 g, 79%; white solid; m.p.: 259–260 °C; <sup>1</sup>H NMR (400 MHz, DMSO-d<sub>6</sub>): 12.71 (br. s, 1H, NH), 8.19 (d, J = 6.6 Hz, 1H, H<sup>Ind</sup>-7), 8.07 (s, 1H, H<sup>Ind</sup>-2), 7.77 – 7.60 (m, 2H, H<sup>Ar</sup>-2,6), 7.44 – 7.26 (m, 3H, H<sup>Ind</sup>-4,5,6), 7.07 (m, 2H, H<sup>Ar</sup>-3,5), 6.31 (s, 2H, NH<sub>2</sub>). <sup>13</sup>C NMR (101 MHz, DMSO-d<sub>6</sub>): 185.54 (C=O), 168.48 (O=C-O), 161.08 (d, <sup>1</sup>J<sub>C-F</sub> = 240.0 Hz), 153.81 (C<sup>pyrazole</sup>-5), 149.81 (C<sup>pyrazole</sup>-3), 136.92, 135.12, 134.16, 126.96, 126.34 (d, <sup>3</sup>J<sub>C-F</sub> = 8.7 Hz, 2xCH<sup>Ar</sup>-2,6), 122.27 (C<sup>Ar</sup>-1), 121.78, 121.12, 117.33, 116.52 (d, <sup>2</sup>J<sub>C-F</sub> = 23.0 Hz, 2xCH<sup>Ar</sup>-2,6), 112.48, 103.66 (C<sup>pyrazole</sup>-4). MS (m/z): 365 (M<sup>+</sup>+1). Anal. calcd. for C<sub>19</sub>H<sub>13</sub>FN<sub>4</sub>O<sub>3</sub>: C, 62.64; H, 3.60; N, 15.38; found: C 62.63; H 3.57; N 15.40.

**4-(3-(4-Fluorophenyl)-1,2,4-oxadiazol-5-yl)-1-phenyl-1H-1,2,3-triazol-5-amine (5a):** Yield 0.56 g

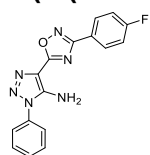

(87%), white solid; m.p.: 251–252°C. <sup>1</sup>H NMR (400 MHz, DMSO-d<sub>6</sub>): 8.26 (dd, J = 8.1, 5.7 Hz, 2H, H<sup>Ar</sup>-2,6), 7.69 – 7.57 (m, 5H, H<sup>Ph</sup>), 7.41 (t, J = 8.7 Hz, 2H, H<sup>Ar</sup>-3,5), 6.96 (s, 2H, NH<sub>2</sub>). <sup>13</sup>C NMR (126 MHz, DMSO-d<sub>6</sub>): 169.57 (C<sup>oxadiazole-5</sup>), 166.96 (C<sup>oxadiazole-3</sup>), 164.46 (d, <sup>1</sup>J<sub>C-F</sub> = 249.3 Hz, C<sup>Ar-4</sup>), 145.20 (C<sup>triazole-5</sup>), 134.82 (C<sup>Ph-1</sup>), 130.43 (d, <sup>3</sup>J<sub>C-F</sub> = 8.9 Hz, 2xCH<sup>Ar-2,6</sup>), 130.33 (2xCH<sup>Ph-3,5</sup>), 130.02 (CH<sup>Ph-4</sup>), 125.20 (2xCH<sup>Ph-2,6</sup>), 123.23 (d, <sup>4</sup>J<sub>C-F</sub> = 2.9 Hz, C<sup>Ar-1</sup>), 116.68 (d, <sup>2</sup>J<sub>C-F</sub> = 22.0 Hz, 2xCH<sup>Ar-3,5</sup>), 115.13 (C<sup>triazole-4</sup>). MS (m/z): 323 (M<sup>+</sup>+1). Anal. calcd. for C<sub>16</sub>H<sub>11</sub>FN<sub>6</sub>O: C 59.63; H 3.44; N 26.08; found: C 59.72; H 3.49; N 26.01

**4-(3-(4-Chlorophenyl)-1,2,4-oxadiazol-5-yl)-1-m-tolyl-1H-1,2,3-triazol-5-amine (5b):** Yield 0.60 g

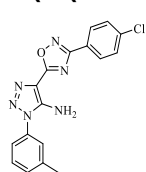

(85%), white solid; m.p.: 252–253°C. <sup>1</sup>H NMR (400 MHz, DMSO-d<sub>6</sub>): 8.23 (d, 2H, J = 7.2 Hz, H<sup>Ar</sup>-3,5), 7.66 (d, 2H, J = 7.2 Hz, H<sup>Ar</sup>-2,6), 7.57 – 7.50 (m, 1H, H<sup>Ar</sup>), 7.44-7.42 (m, 3H, H<sup>Ar</sup>), 6.99 (s, 2H, NH<sub>2</sub>), 2.43 (s, 3H, Me). <sup>13</sup>C NMR (126 MHz, DMSO-d<sub>6</sub>): 169.74 (C<sup>oxadiazole-5</sup>), 167.04 (C<sup>oxadiazole-3</sup>), 145.21 (C<sup>triazole-5</sup>), 140.13 (C<sup>Tol-3</sup>), 136.81 (C<sup>Ar-4</sup>), 134.71 (C<sup>Tol-1</sup>), 130.69 (CH<sup>Tol-5</sup>), 130.16 (CH<sup>Tol-4</sup>), 129.77 (2xCH<sup>Ar-3,5</sup>), 129.73 (2xCH<sup>Ar-2,6</sup>), 125.67 (CH<sup>Tol-2</sup>), 125.59 (C<sup>Ar-1</sup>), 122.27 (CH<sup>Tol-6</sup>), 115.06 (C<sup>triazole-4</sup>), 21.36 (Me). MS (m/z): 353 (M<sup>+</sup>+1). Anal. calcd. for C<sub>17</sub>H<sub>13</sub>ClN<sub>6</sub>O: C, 57.88; H, 3.71; N, 23.82; found: C 57.87; H 3.73; N 23.79

**1-(4-Fluorophenyl)-4-(3-o-tolyl-1,2,4-oxadiazol-5-yl)-1H-1,2,3-triazol-5-amine (5c):** Yield 0.61 g

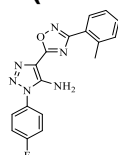

(91%), white solid; m.p.: 213–214°C. <sup>1</sup>H NMR (400 MHz, DMSO-d<sub>6</sub>): 8.17 (d, J = 7.5 Hz, 1H, H<sup>Ar-6</sup>), 7.71 (dd, J = 8.6, 4.8 Hz, 2H, H<sup>Ar-3,5</sup>), 7.55 – 7.45 (m, 3H, H<sup>Ar</sup>), 7.40 (t, J = 7.2 Hz, 2H, H<sup>Ar-2,6</sup>), 6.89 (s, 2H, NH<sub>2</sub>), 2.61 (s, 3H, Me). <sup>13</sup>C NMR (126 MHz, DMSO-d<sub>6</sub>): 168.56 (C<sup>oxadiazole-5</sup>), 168.37 (C<sup>oxadiazole-3</sup>), 162.77 (d, <sup>1</sup>J<sub>C-F</sub> = 246.8 Hz, C<sup>Ar-4</sup>), 145.47 (C<sup>triazole-5</sup>), 138.07 (C<sup>Tol-2</sup>), 131.79 (CH<sup>Tol-3</sup>), 131.29 (CH<sup>Tol-4</sup>), 131.18 (d, <sup>4</sup>J<sub>C-F</sub> = 2.7 Hz, C<sup>Ar-1</sup>), 130.69 (CH<sup>Tol-6</sup>), 128.06 (d, <sup>3</sup>J<sub>C-F</sub> = 9.3 Hz, 2xCH<sup>Ar-2,6</sup>), 126.61 (CH<sup>Tol-5</sup>), 126.01 (C<sup>Tol-1</sup>), 117.21 (d, <sup>2</sup>J<sub>C-F</sub> = 23.3 Hz, 2xCH<sup>Ar-3,5</sup>), 115.04 (C<sup>triazole-4</sup>), 22.32 (Me). MS (m/z): 337 (M<sup>+</sup>+1). Anal. calcd. for C<sub>17</sub>H<sub>13</sub>FN<sub>6</sub>O: C, 60.71; H, 3.90; N, 24.99; found: C 60.73; H 3.89; N 25.01

**1-(4-Chlorophenyl)-4-(3-(4-fluorophenyl)-1,2,4-oxadiazol-5-yl)-1H-1,2,3-triazol-5-amine (5d):**

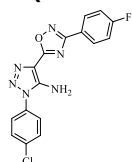

Yield 0.56 g (78%), white solid; m.p.: 284–285°C. <sup>1</sup>H NMR (400 MHz, DMSO-d<sub>6</sub>): 8.26 (dd, J = 8.6, 5.2 Hz, 2H, H<sup>Ar-2,6</sup>), 7.78 (d, J = 8.7 Hz, 2H, H<sup>Ar-2,6</sup>), 7.69 (d, J = 8.7 Hz, 2H, H<sup>Ar-3,5</sup>), 7.42 (t, J = 8.6 Hz, 2H, H<sup>Ar-3,5</sup>), 6.98 (s, 2H, NH<sub>2</sub>). <sup>13</sup>C NMR (101 MHz, DMSO-d<sub>6</sub>): 169.73 (C<sup>oxadiazole-5</sup>), 166.95 (C<sup>oxadiazole-3</sup>), 164.63 (d, <sup>1</sup>J<sub>C-F</sub> = 250.3 Hz, C<sup>Ar-4</sup>), 146.63 (C<sup>triazole-5</sup>), 134.19 (C<sup>Ar-1</sup>), 133.93 (C<sup>Ar-4</sup>), 130.45 (d, <sup>3</sup>J<sub>C-F</sub> = 8.9 Hz, 2xCH<sup>Ar-2,6</sup>), 130.22 (2xCH<sup>Ar-3,5</sup>), 126.64 (2xCH<sup>Ar-2,6</sup>), 123.42 (d, <sup>4</sup>J<sub>C-F</sub> = 3.4 Hz, C<sup>Ar-1</sup>), 116.74 (d, <sup>2</sup>J<sub>C-F</sub> = 22.0 Hz, 2xCH<sup>Ar-3,5</sup>), 114.93 (C<sup>triazole-4</sup>). MS (m/z): 357 (M<sup>+</sup>+1). Anal. calcd. for C<sub>16</sub>H<sub>10</sub>ClFN<sub>6</sub>O: C, 53.87; H, 2.83; N, 23.56; found: C 53.85; H 2.80; N 23.58

**4-(3-(2-Chlorophenyl)-1,2,4-oxadiazol-5-yl)-1-(2,4-dichlorophenyl)-1H-1,2,3-triazol-5-amine (5e):**

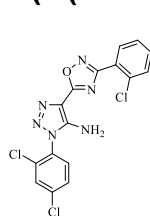

Yield 0.67 g (82%), white solid; m.p.: 264–265°C. <sup>1</sup>H NMR (400 MHz, DMSO-d<sub>6</sub>): 8.19 (d, J = 7.2 Hz, 1H, H<sup>Ar-6</sup>), 8.02 (s, 1H, H<sup>Ar-3</sup>), 7.78 (d, J = 8.2 Hz, 1H, H<sup>Ar-3</sup>), 7.74 – 7.66 (m, 2H, H<sup>Ar</sup>), 7.62 (t, J = 7.2 Hz, 1H, H<sup>Ar-4</sup>), 7.55 (t, J = 7.4 Hz, 1H, H<sup>Ar-4</sup>), 7.08 (s, 2H, NH<sub>2</sub>). <sup>13</sup>C NMR (126 MHz, DMSO-d<sub>6</sub>): 168.99 (C<sup>oxadiazole-5</sup>), 166.64 (C<sup>oxadiazole-3</sup>), 146.52 (C<sup>triazole-5</sup>), 136.92, 133.38, 133.02, 132.78, 132.71, 132.13, 131.25, 131.08, 130.72, 129.38, 128.04, 126.01, 113.91 (C<sup>triazole-4</sup>). MS (m/z): 407, 409 (M<sup>+</sup>+1). Anal. calcd. for C<sub>16</sub>H<sub>9</sub>Cl<sub>3</sub>N<sub>6</sub>O: C, 47.14; H, 2.23; N, 20.62; found: C 47.16; H 2.21; N 20.61

**<sup>1</sup>H NMR 2-(3-(o-Tolyl)-1,2,4-oxadiazol-5-yl)acetonitrile (1b):**

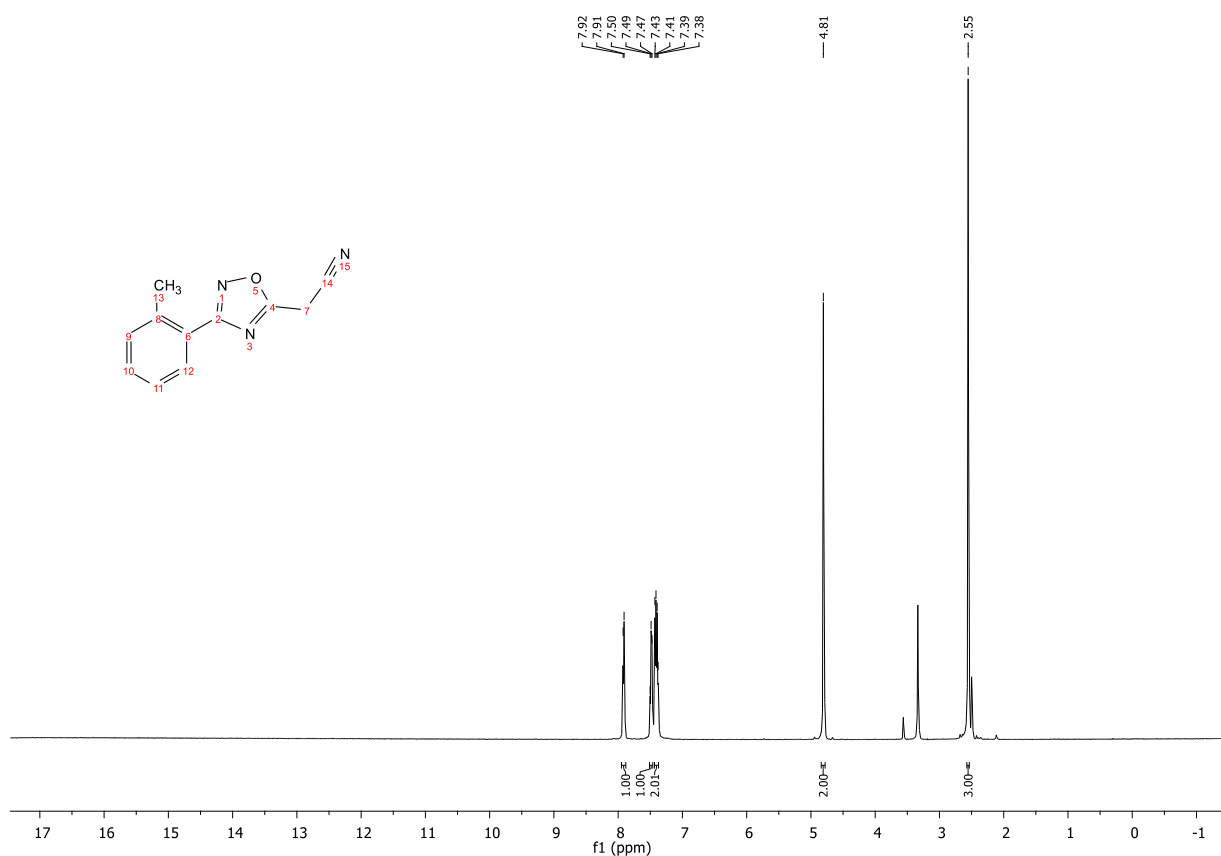

**<sup>13</sup>C NMR 2-(3-(o-Tolyl)-1,2,4-oxadiazol-5-yl)acetonitrile (1b):**

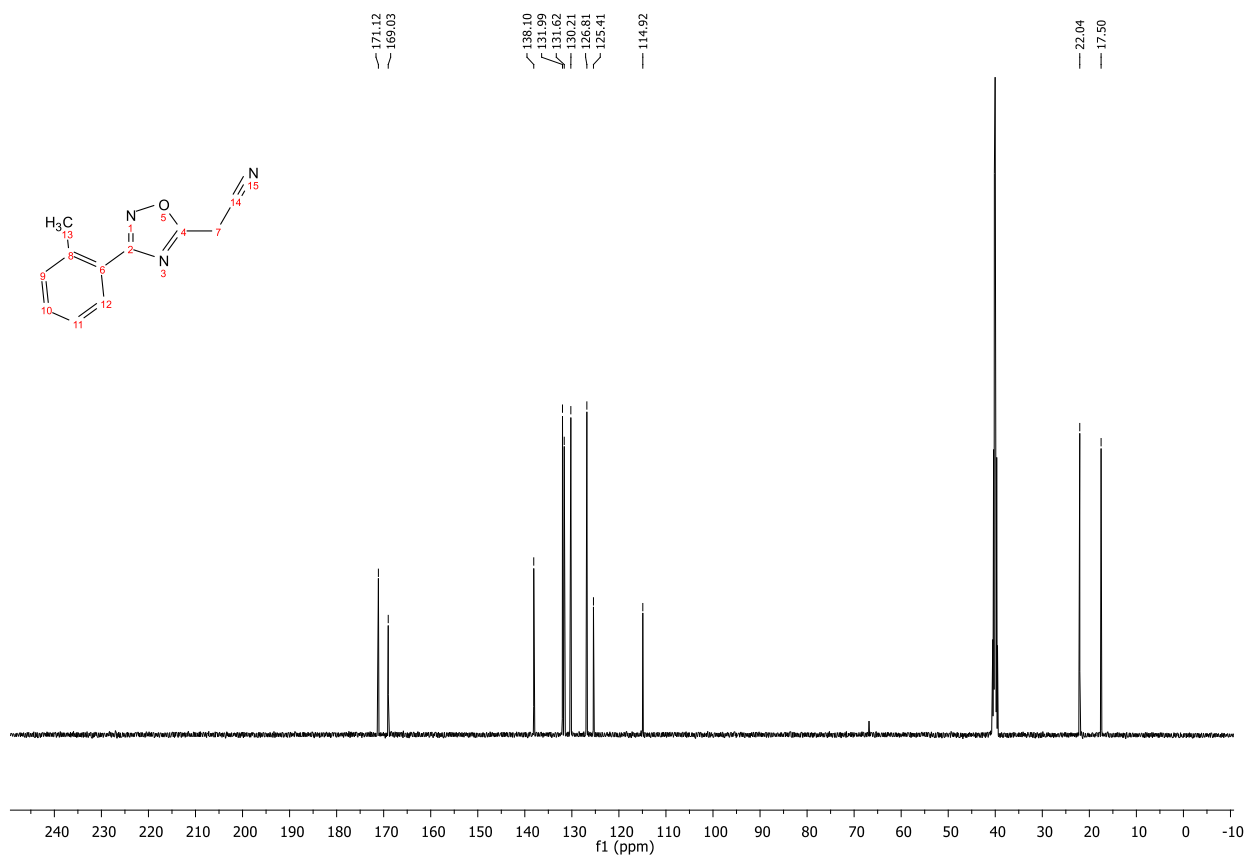

**<sup>1</sup>H NMR 2-(3-(4-Fluorophenyl)-1,2,4-oxadiazol-5-yl)acetonitrile (1c):**

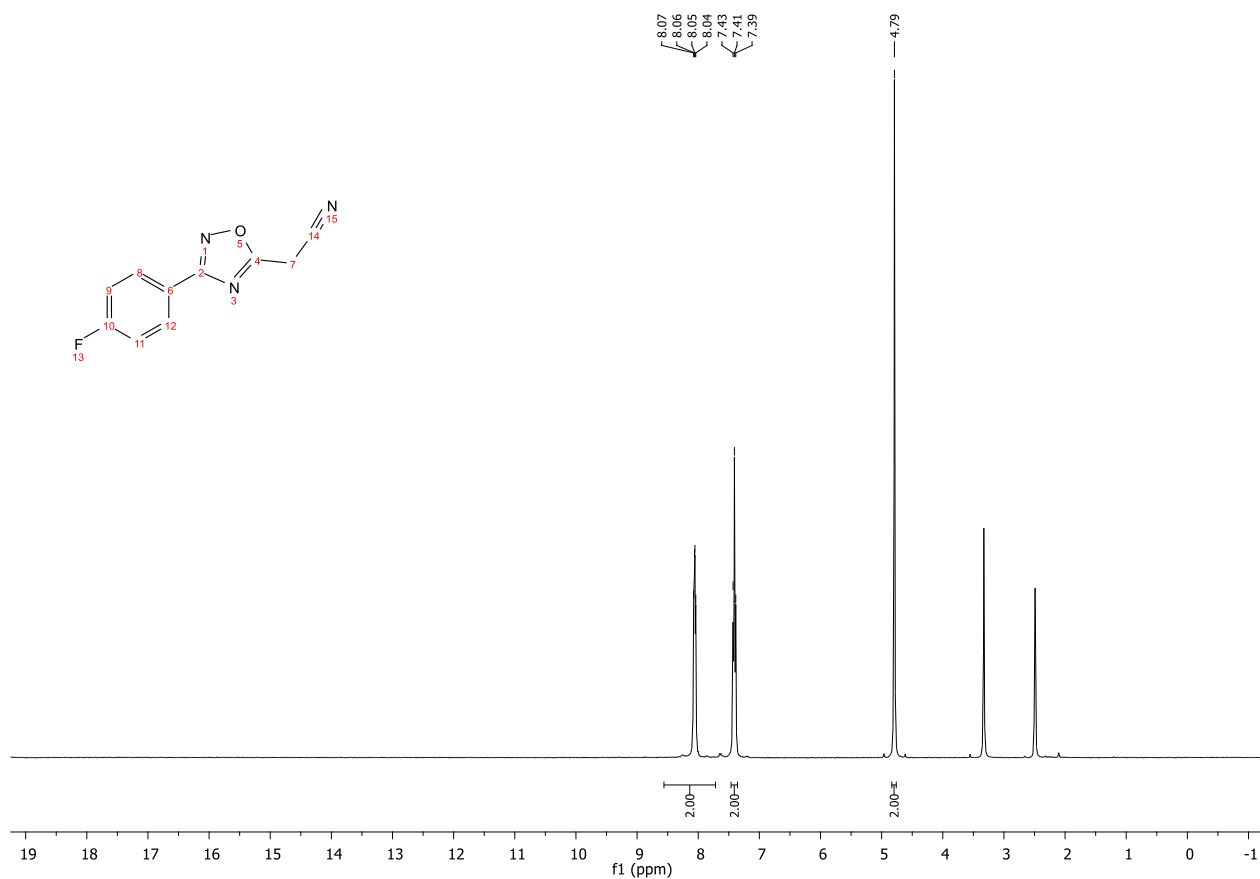

**<sup>13</sup>C NMR 2-(3-(4-Fluorophenyl)-1,2,4-oxadiazol-5-yl)acetonitrile (1c):**

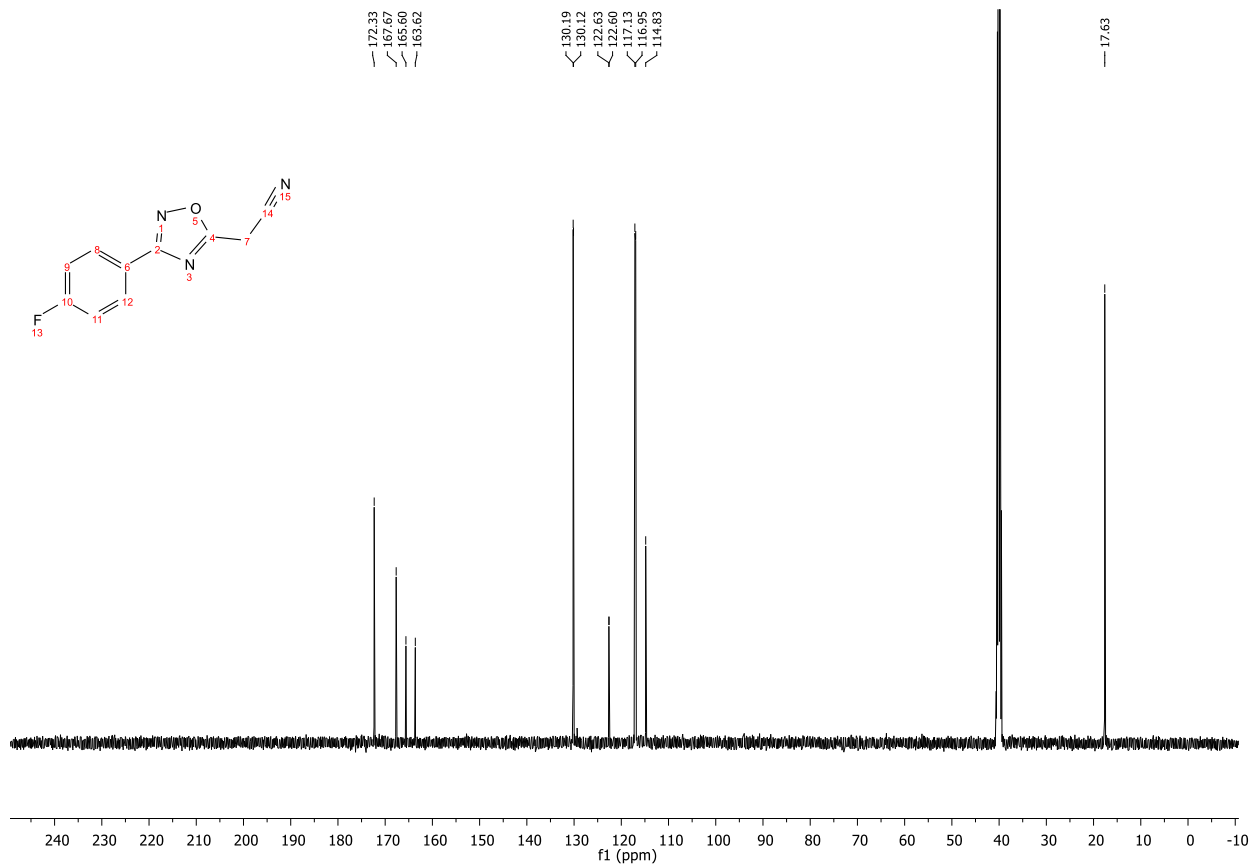

**<sup>1</sup>H NMR 2-(3-(2-Chlorophenyl)-1,2,4-oxadiazol-5-yl)acetonitrile (1d):**

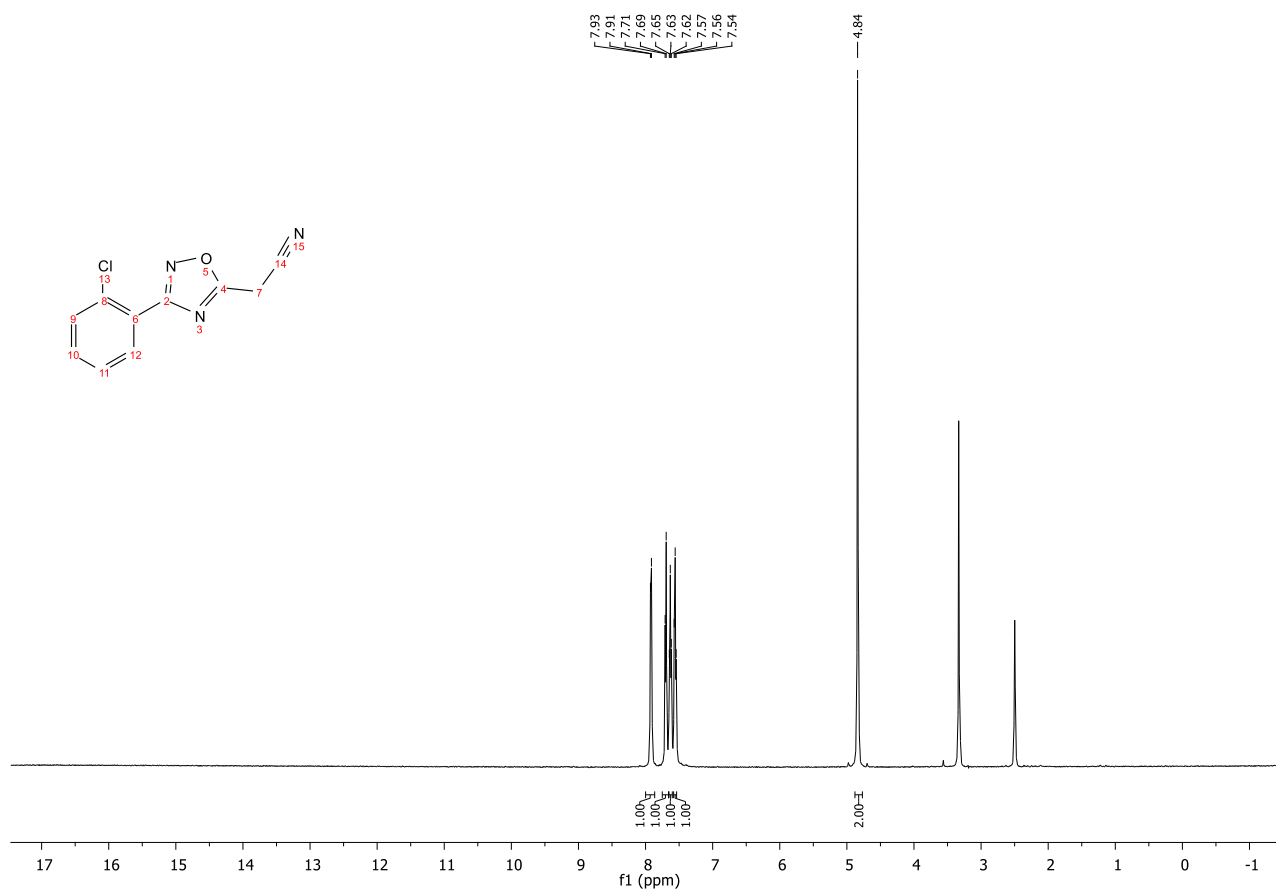

**<sup>13</sup>C NMR 2-(3-(2-Chlorophenyl)-1,2,4-oxadiazol-5-yl)acetonitrile (1d):**

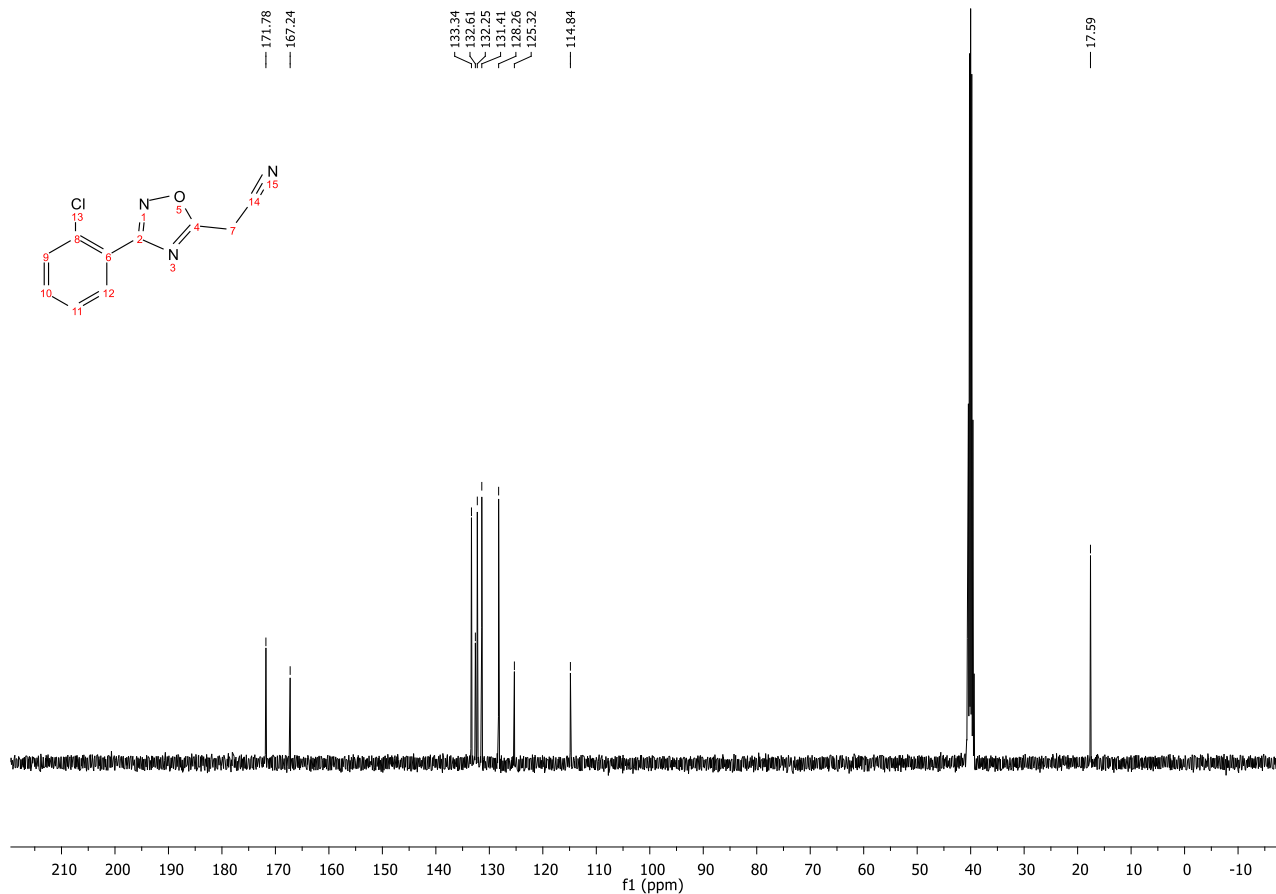



**<sup>1</sup>H NMR 2-(3-(4-Chlorophenyl)-1,2,4-oxadiazol-5-yl)acetonitrile (1e):**

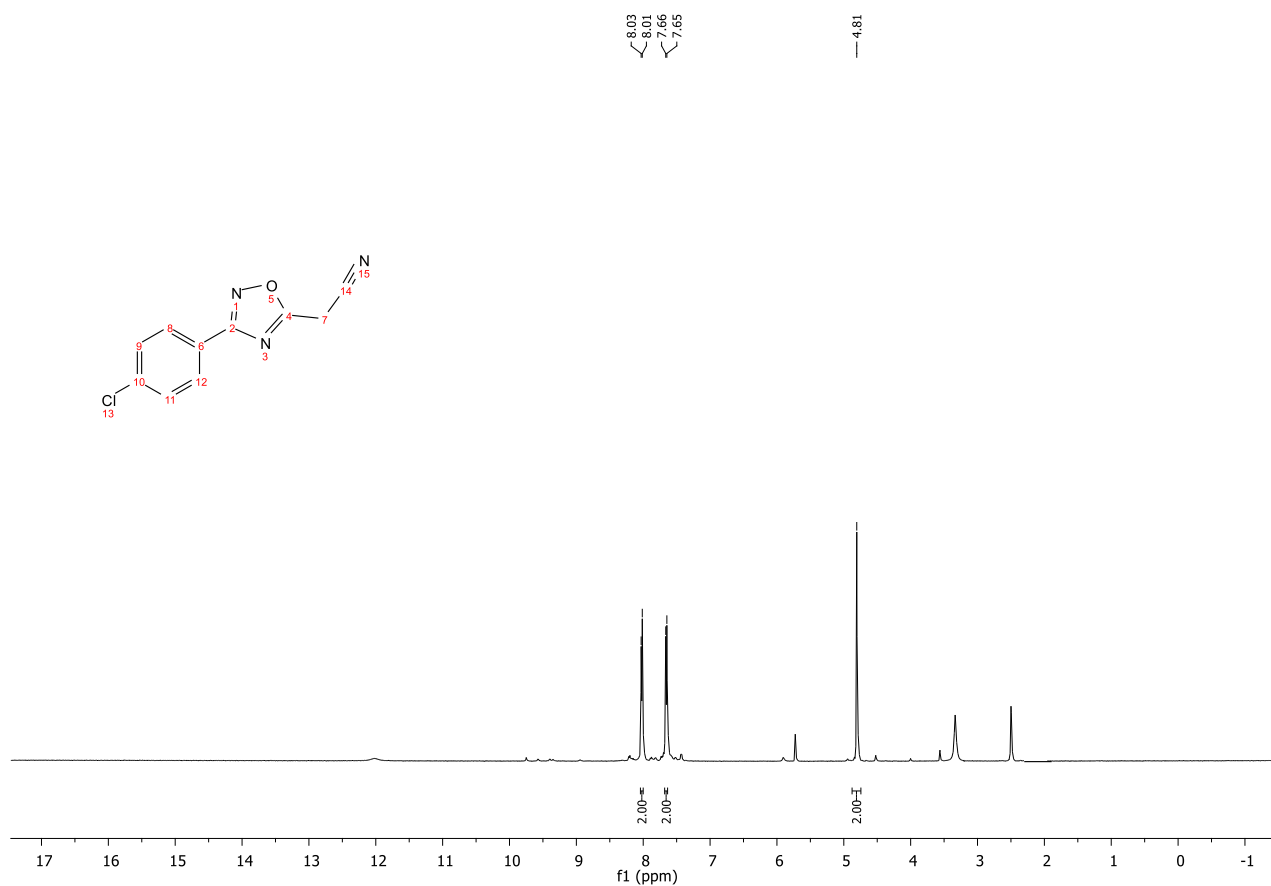

**<sup>13</sup>C NMR 2-(3-(4-Chlorophenyl)-1,2,4-oxadiazol-5-yl)acetonitrile (1e):**

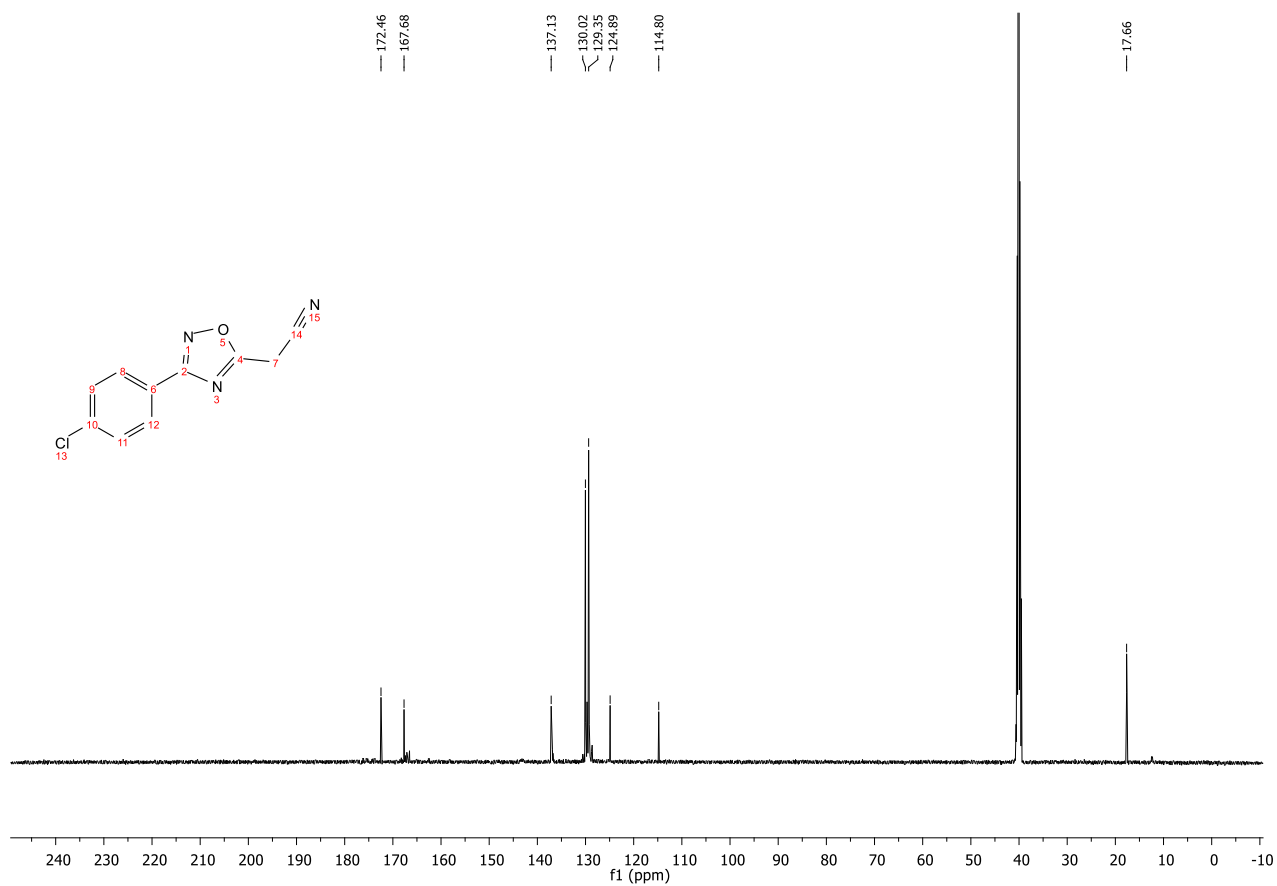

**<sup>1</sup>H NMR** Methyl 5-amino-4-(3-(4-fluorophenyl)-1,2,4-oxadiazol-5-yl)-1-(p-tolyl)-1H-pyrazole-3-carboxylate (4a):

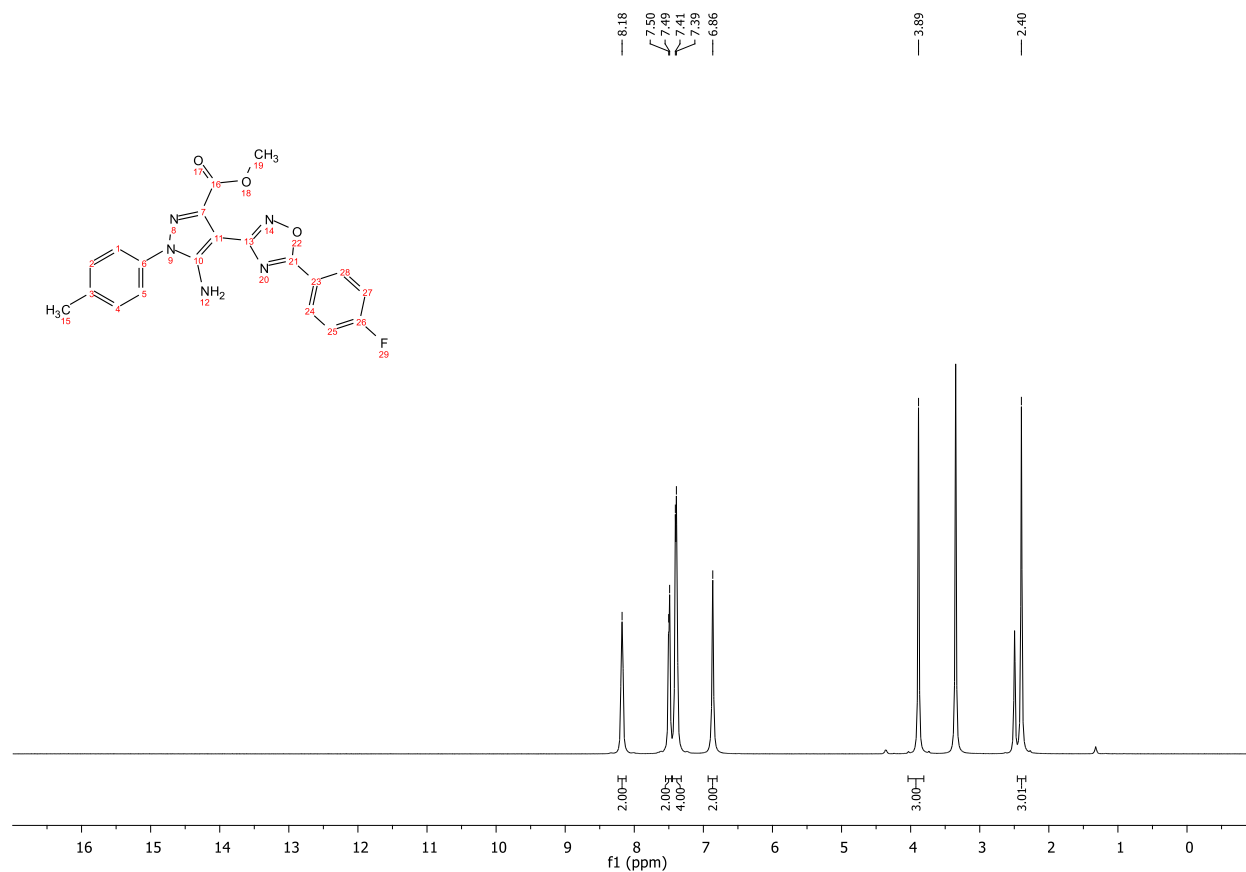

**<sup>13</sup>C NMR** Methyl 5-amino-4-(3-(4-fluorophenyl)-1,2,4-oxadiazol-5-yl)-1-(p-tolyl)-1H-pyrazole-3-carboxylate (4a):

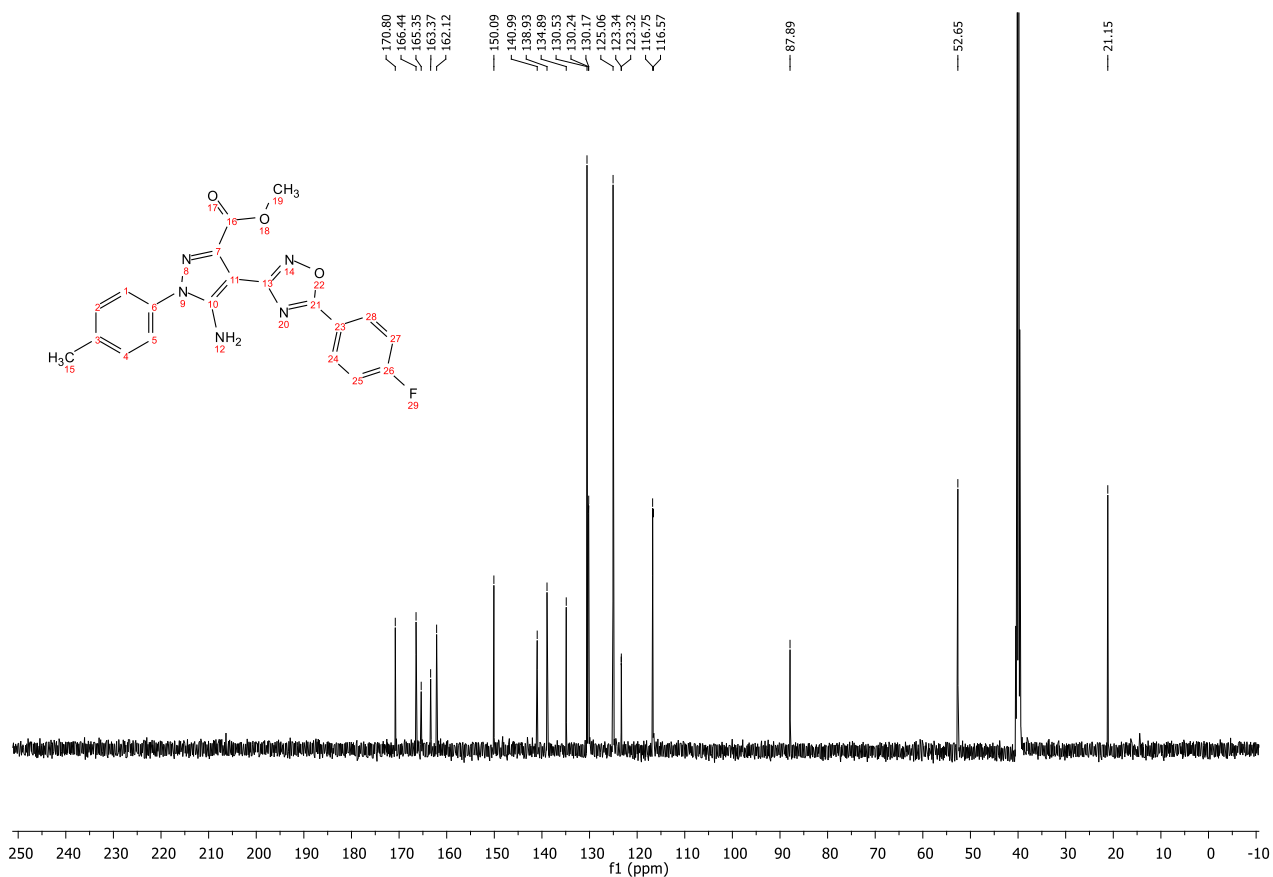

**<sup>1</sup>H NMR** Methyl 5-amino-4-(3-(4-chlorophenyl)-1,2,4-oxadiazol-5-yl)-1-(p-tolyl)-1H-pyrazole-3-carboxylate (4b):

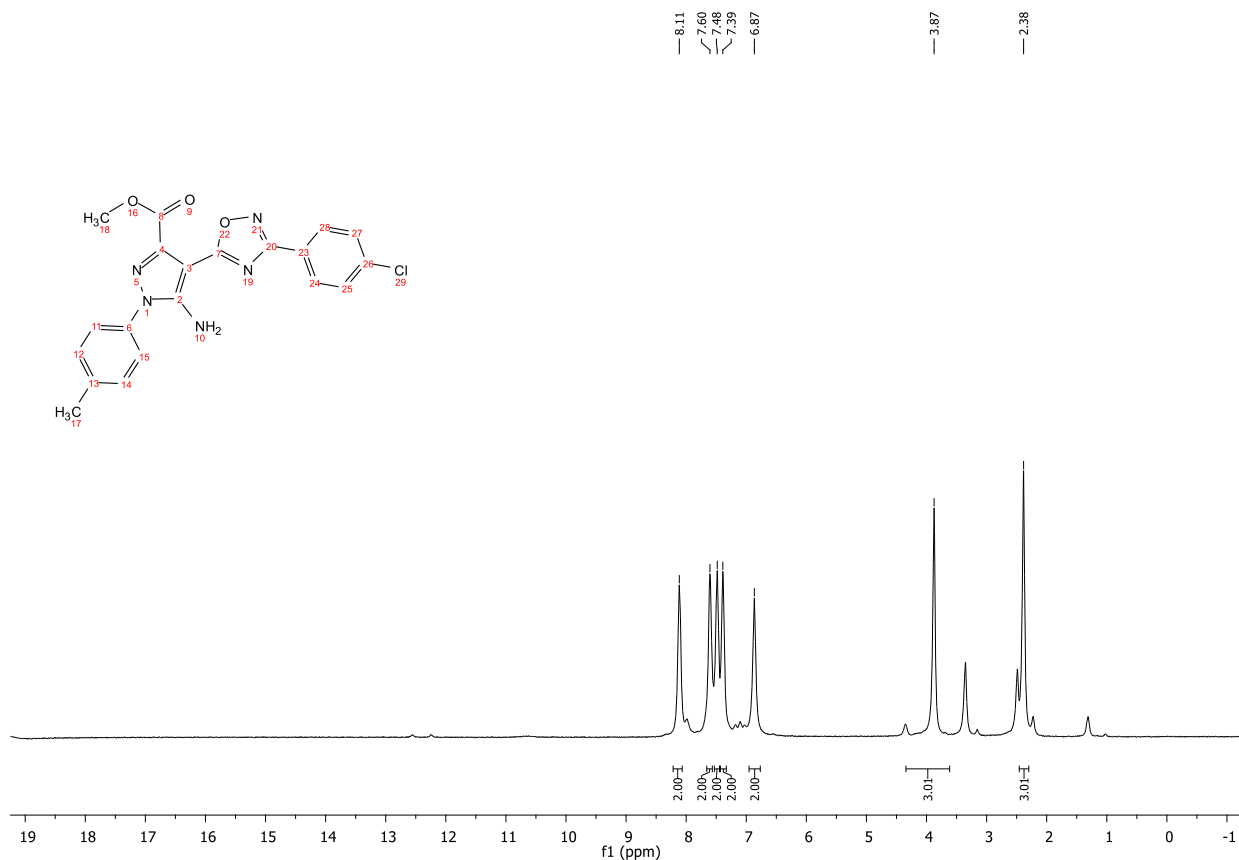

**<sup>13</sup>C NMR** Methyl 5-amino-4-(3-(4-chlorophenyl)-1,2,4-oxadiazol-5-yl)-1-(p-tolyl)-1H-pyrazole-3-carboxylate (4b):

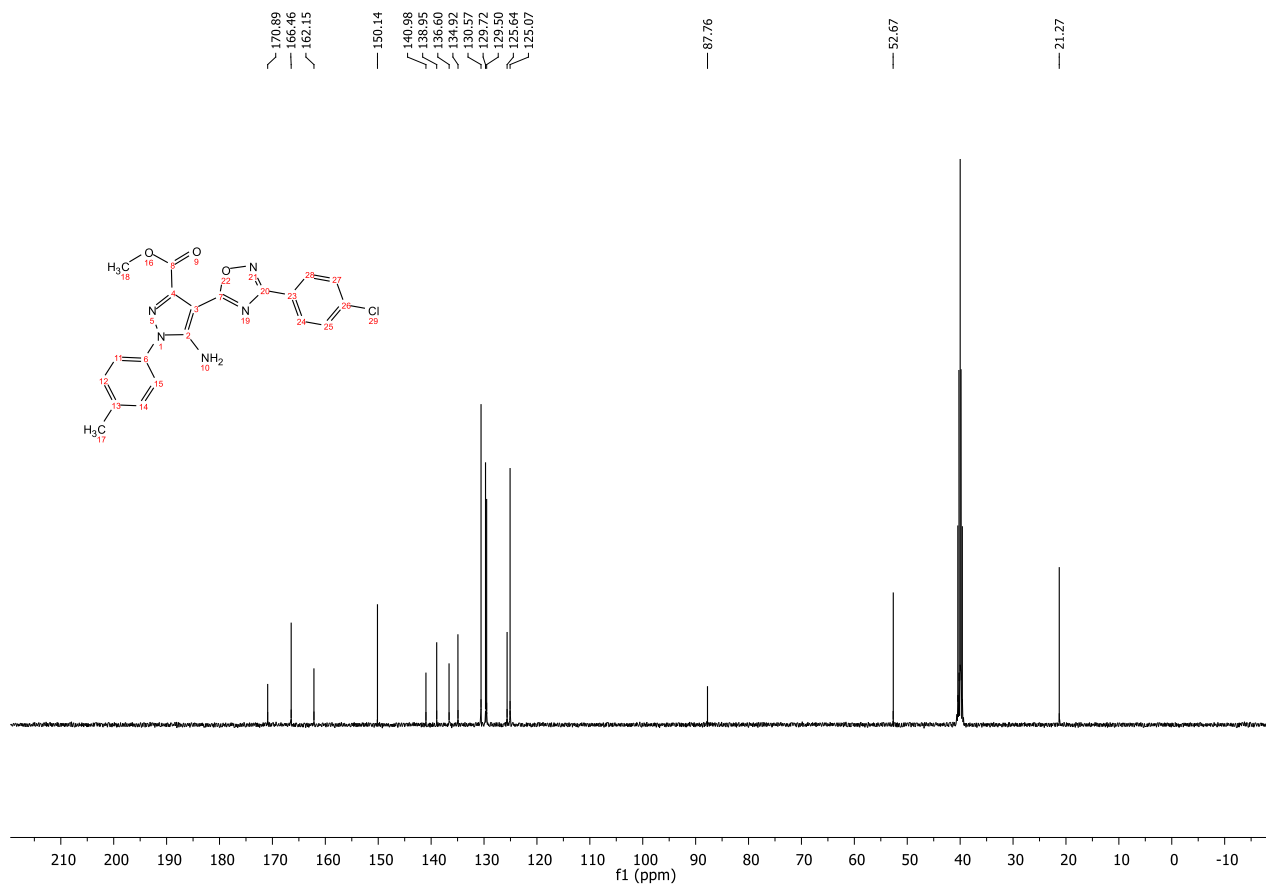

**<sup>1</sup>H NMR**      **Methyl**      **5-amino-1-(4-chlorophenyl)-4-(3-phenyl-1,2,4-oxadiazol-5-yl)-1H-pyrazole-3-carboxylate (4c):**

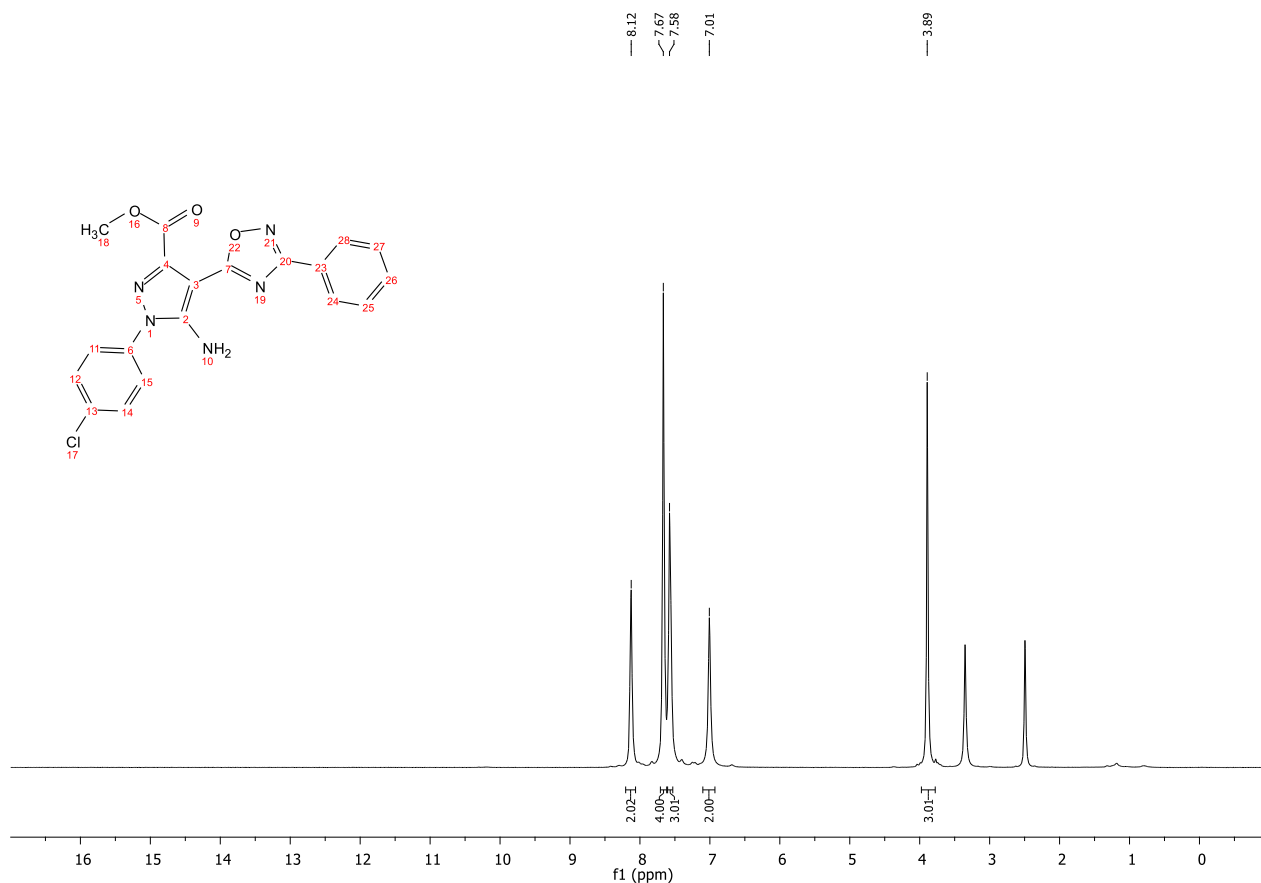

**<sup>13</sup>C NMR**      **Methyl**      **5-amino-1-(4-chlorophenyl)-4-(3-phenyl-1,2,4-oxadiazol-5-yl)-1H-pyrazole-3-carboxylate (4c):**

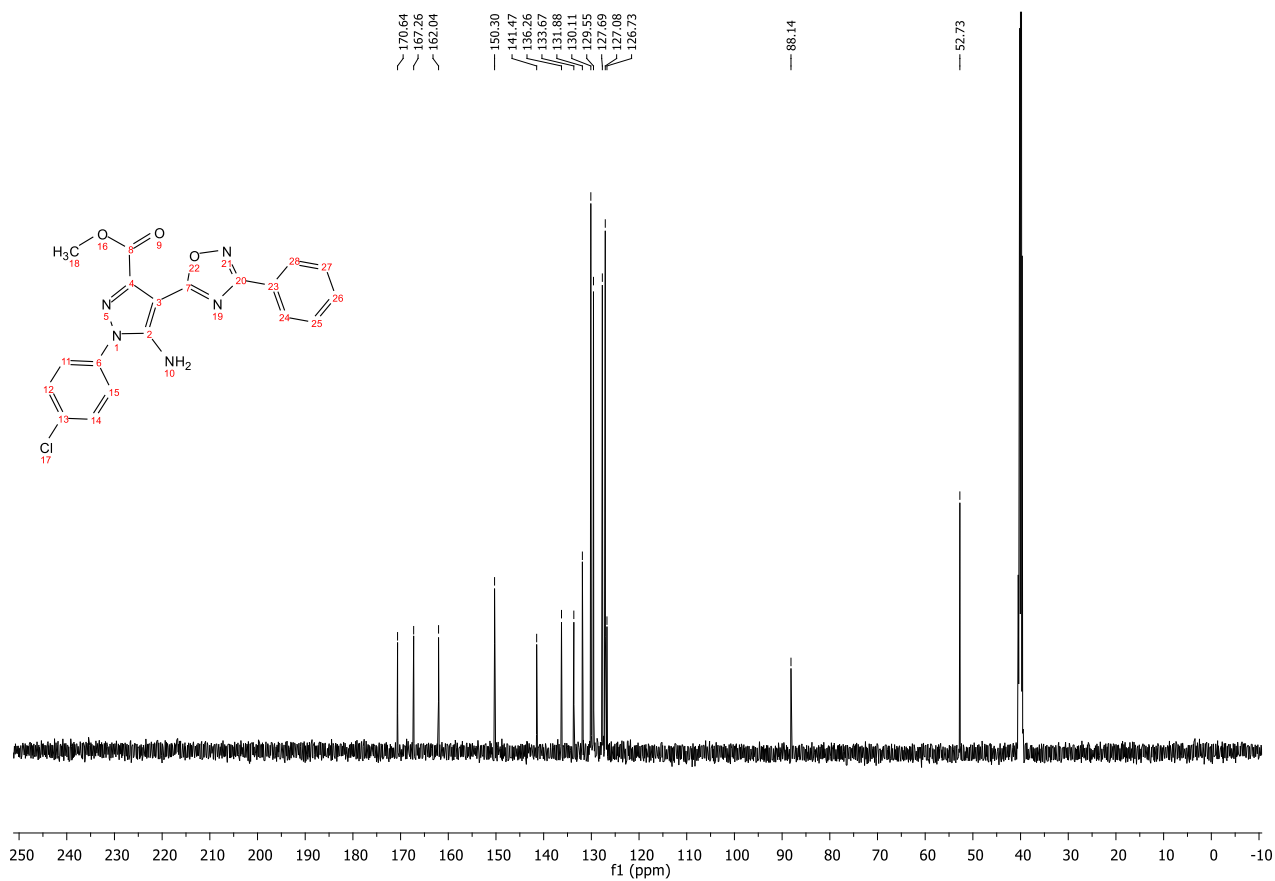

**<sup>1</sup>H NMR** Methyl 5-amino-1-(4-chlorophenyl)-4-(3-(2-chlorophenyl)-1,2,4-oxadiazol-5-yl)-1H-pyrazole-3-carboxylate (4d):

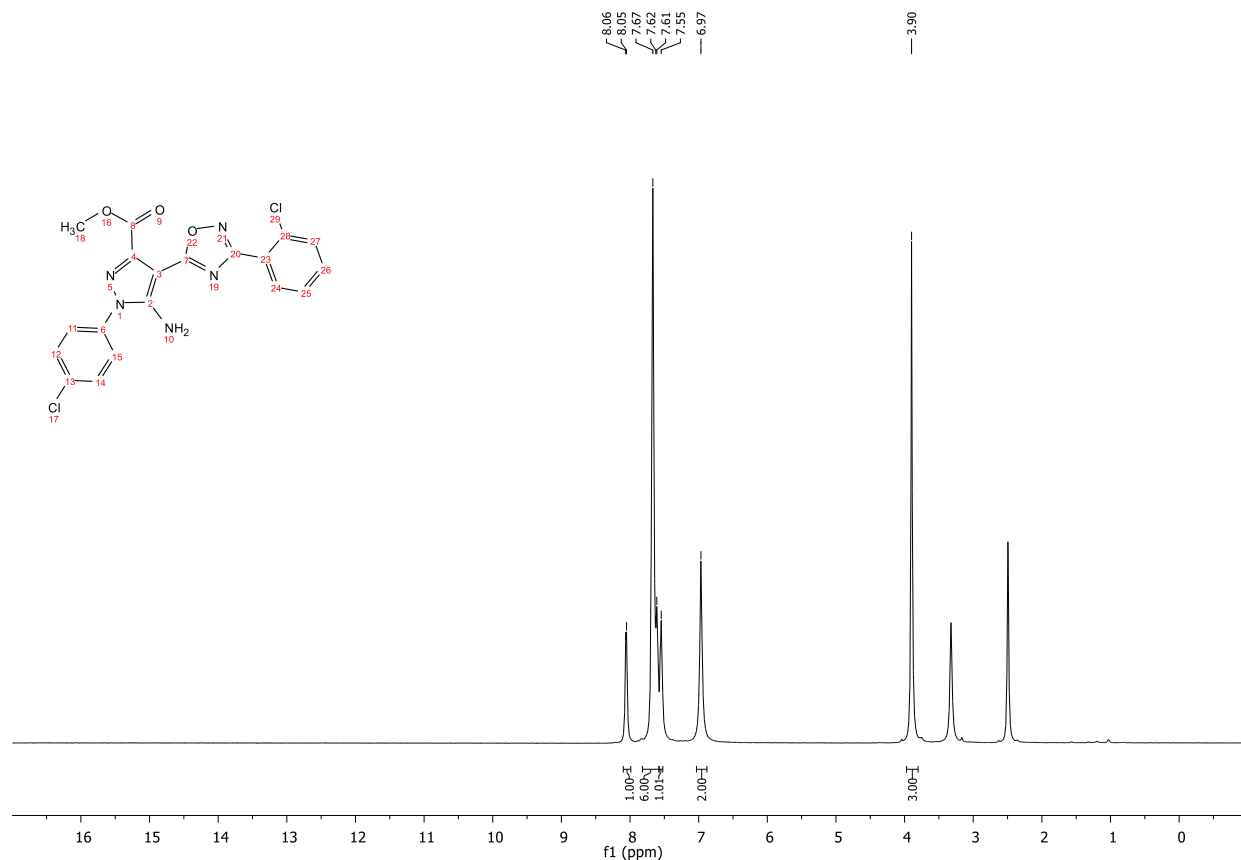

**<sup>13</sup>C NMR** Methyl 5-amino-1-(4-chlorophenyl)-4-(3-(2-chlorophenyl)-1,2,4-oxadiazol-5-yl)-1H-pyrazole-3-carboxylate (4d):

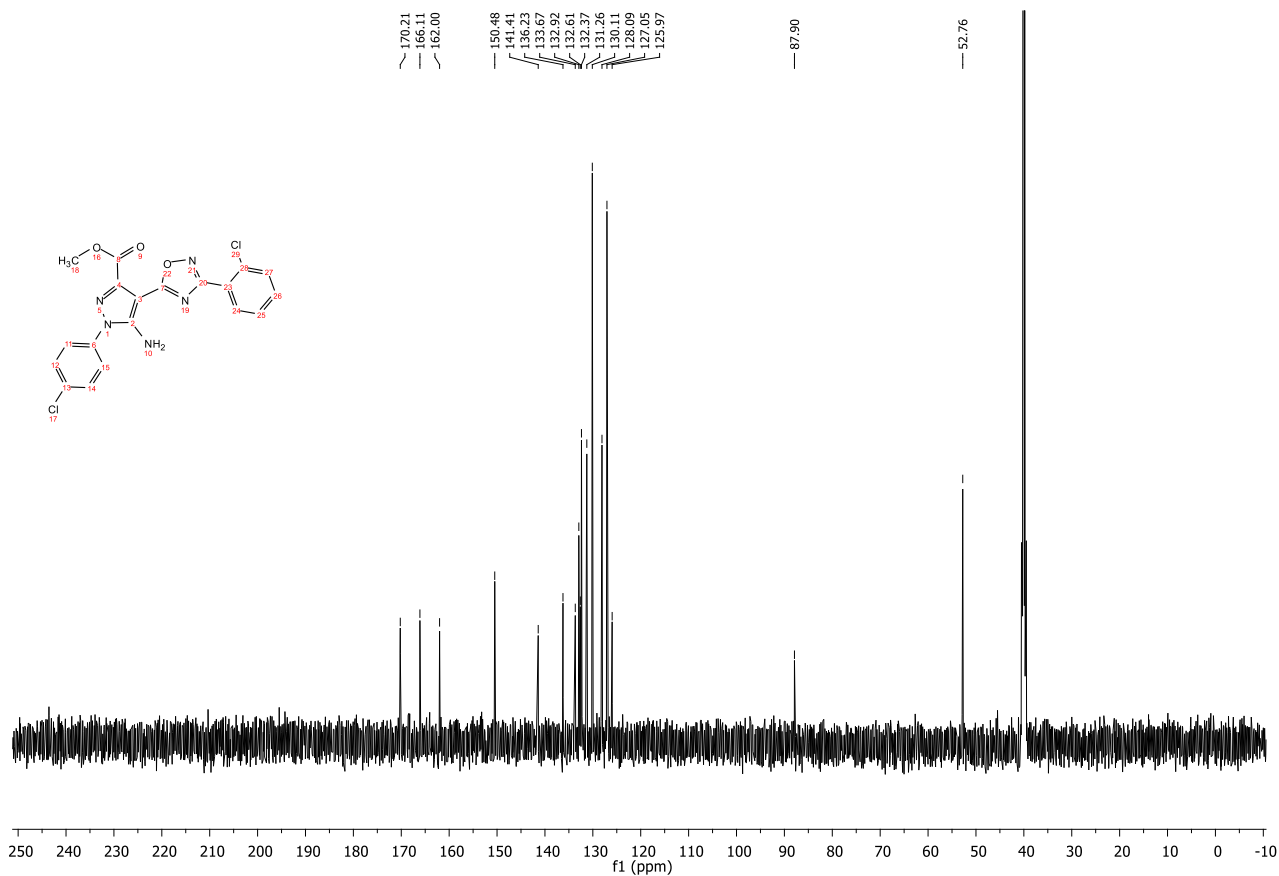

**<sup>1</sup>H NMR Ethyl 5-amino-1-(4-bromophenyl)-4-(3-(o-tolyl)-1,2,4-oxadiazol-5-yl)-1H-pyrazole-3-carboxylate (4e):**

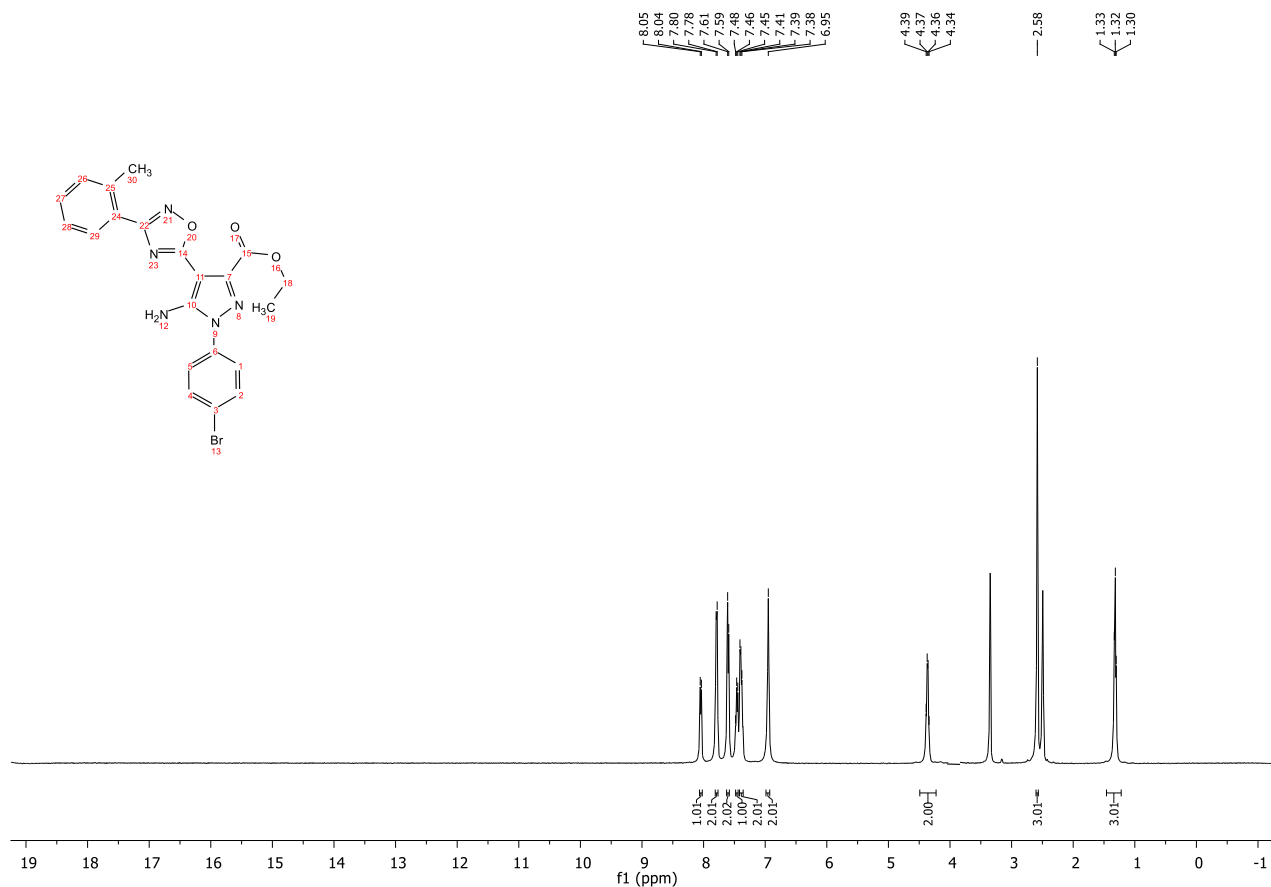

**<sup>13</sup>C NMR Ethyl 5-amino-1-(4-bromophenyl)-4-(3-(o-tolyl)-1,2,4-oxadiazol-5-yl)-1H-pyrazole-3-carboxylate (4e):**

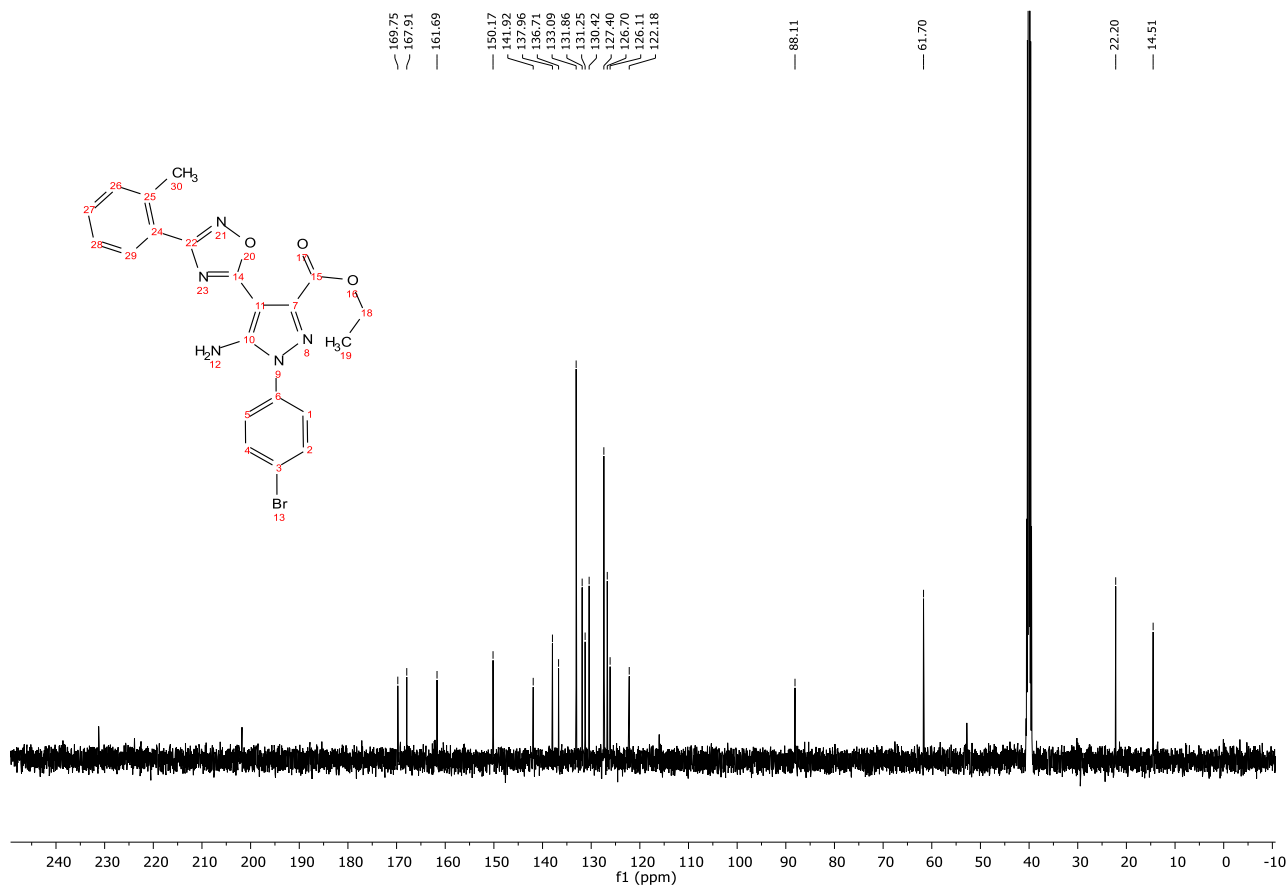

**<sup>1</sup>H NMR** Methyl 5-amino-4-[(1-methyl-1*H*-pyrrol-2-yl)carbonyl]-1-phenyl-1*H*-pyrazole-3-carboxylate (7a):

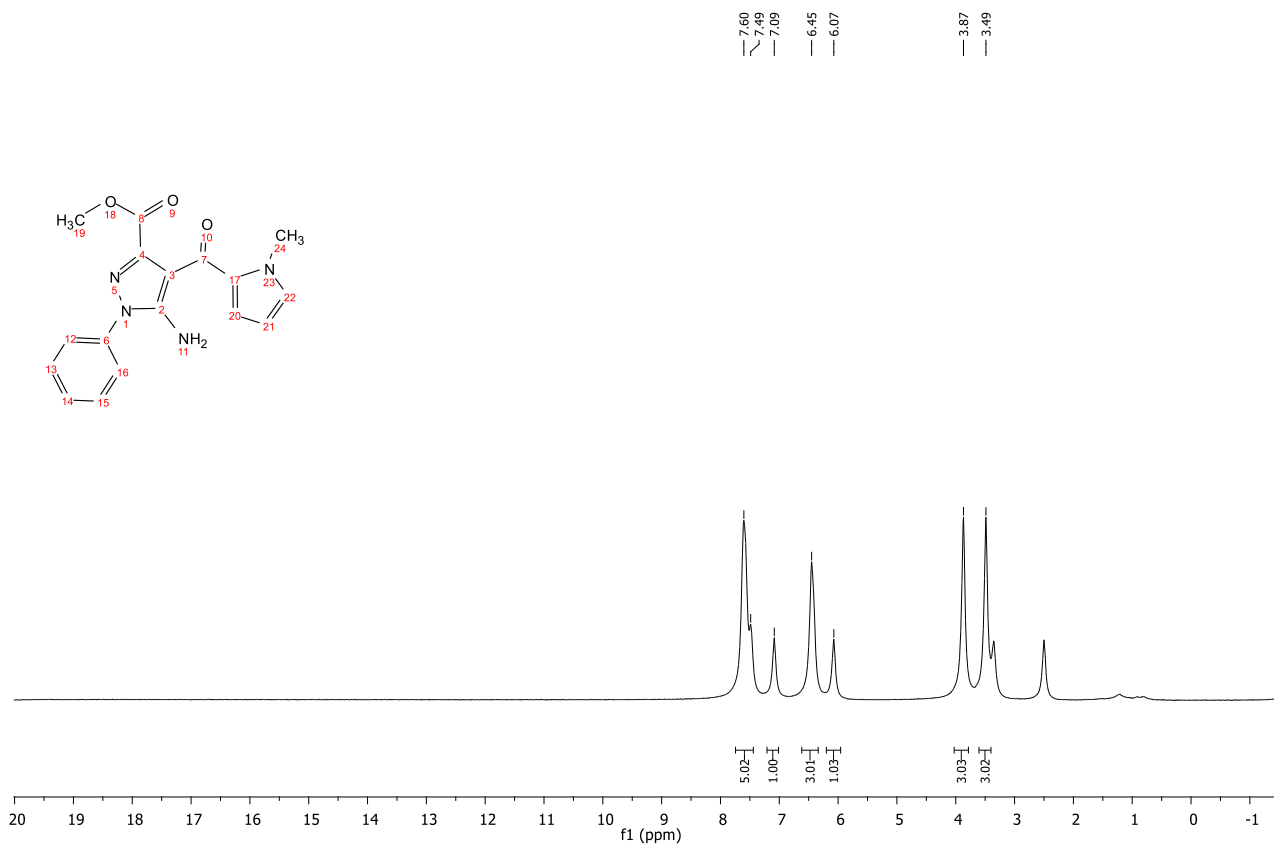

**<sup>13</sup>C NMR** Methyl 5-amino-4-[(1-methyl-1*H*-pyrrol-2-yl)carbonyl]-1-phenyl-1*H*-pyrazole-3-carboxylate (7a):

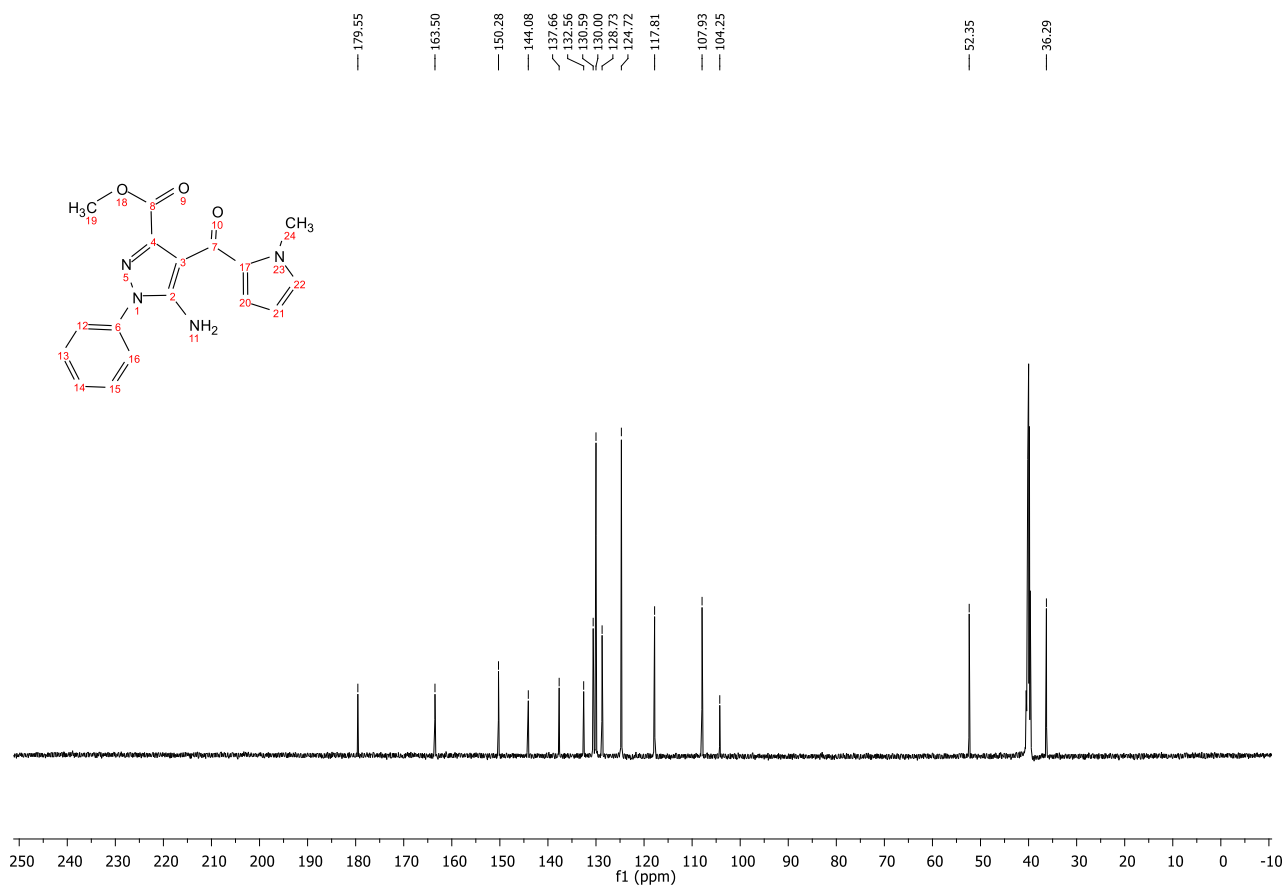

**<sup>1</sup>H NMR Ethyl 5-amino-1-(4-chlorophenyl)-4-(1-methyl-1H-pyrrole-2-carbonyl)-1H-pyrazole-3-carboxylate (7b):**

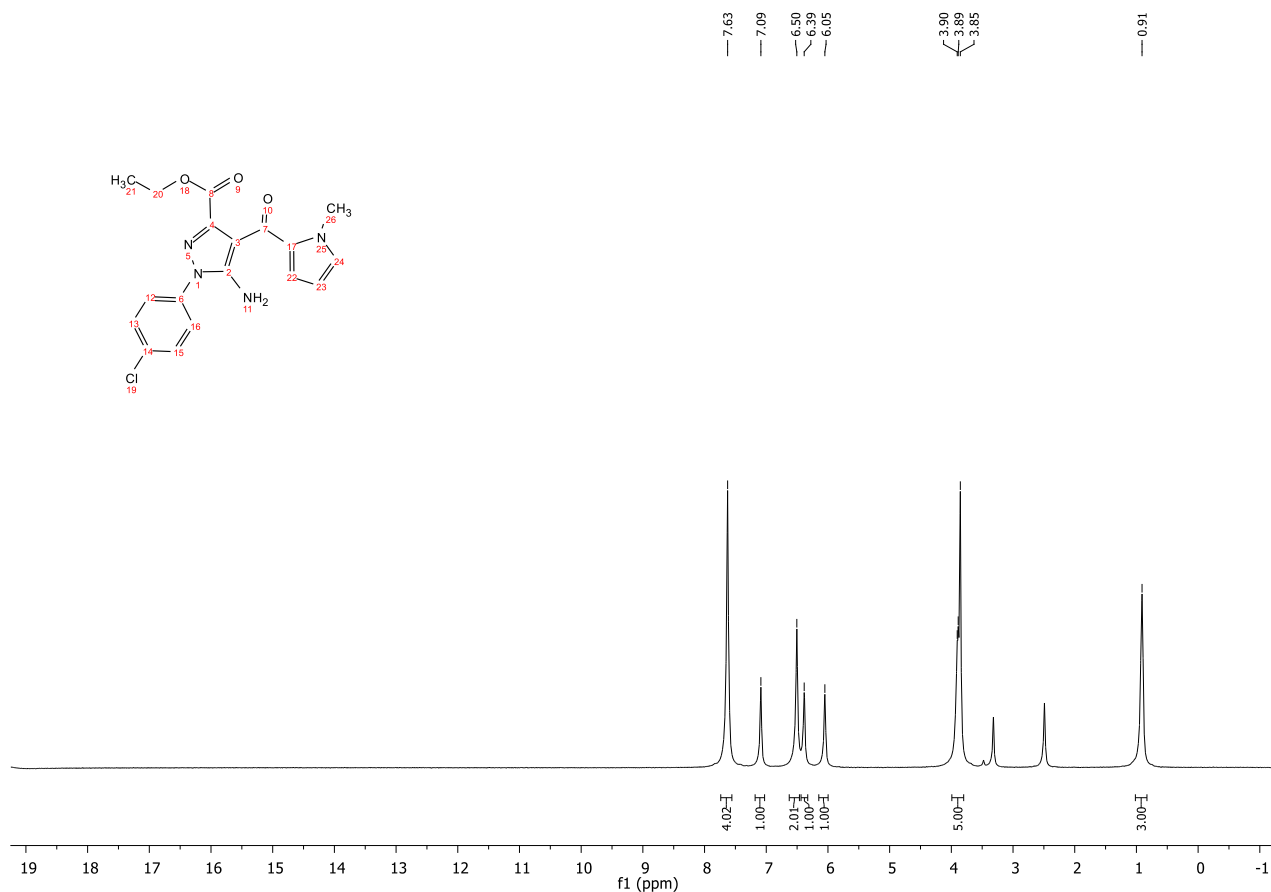

**<sup>13</sup>C NMR Ethyl 5-amino-1-(4-chlorophenyl)-4-(1-methyl-1H-pyrrole-2-carbonyl)-1H-pyrazole-3-carboxylate (7b):**

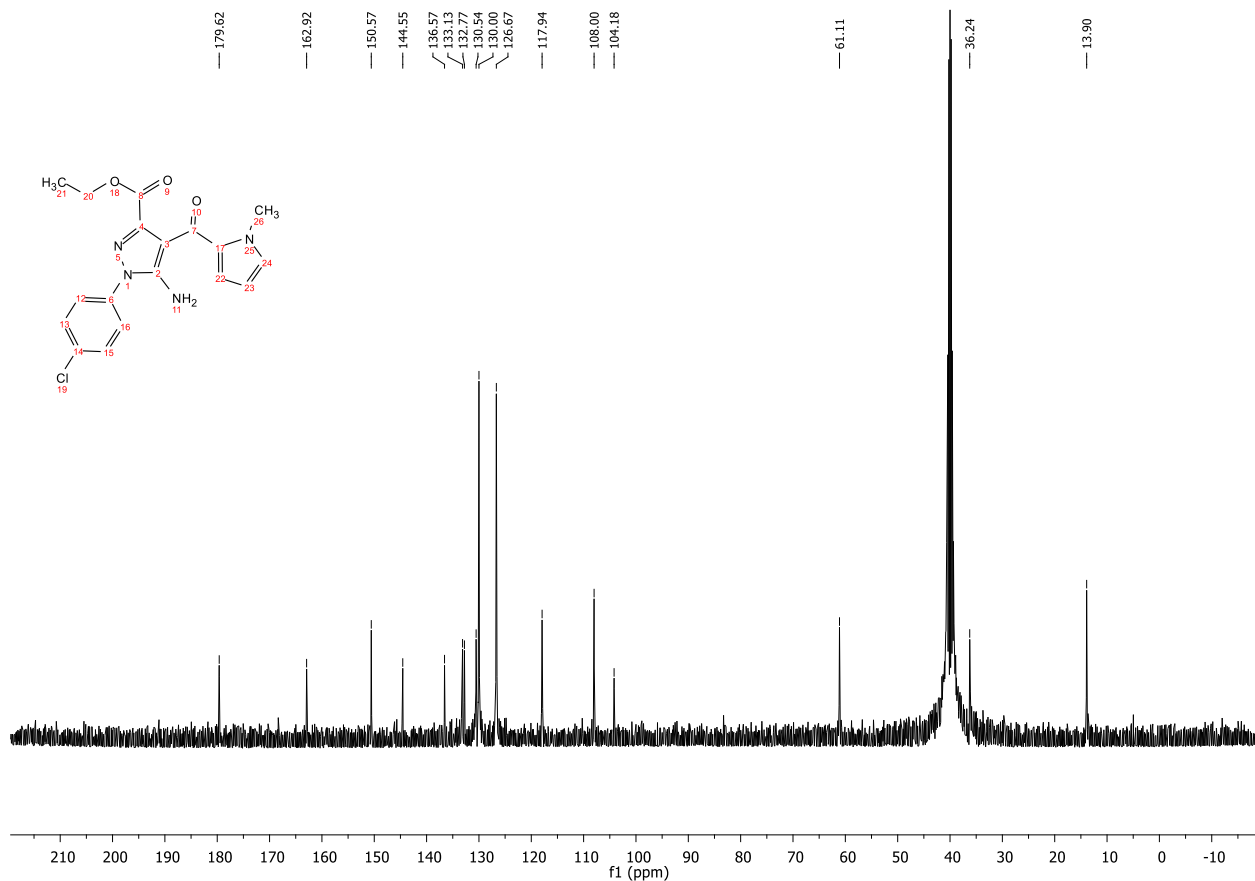



**<sup>1</sup>H NMR Ethyl 5-amino-1-(4-bromophenyl)-4-(1-methyl-1H-pyrrole-2-carbonyl)-1H-pyrazole-3-carboxylate (7c):**

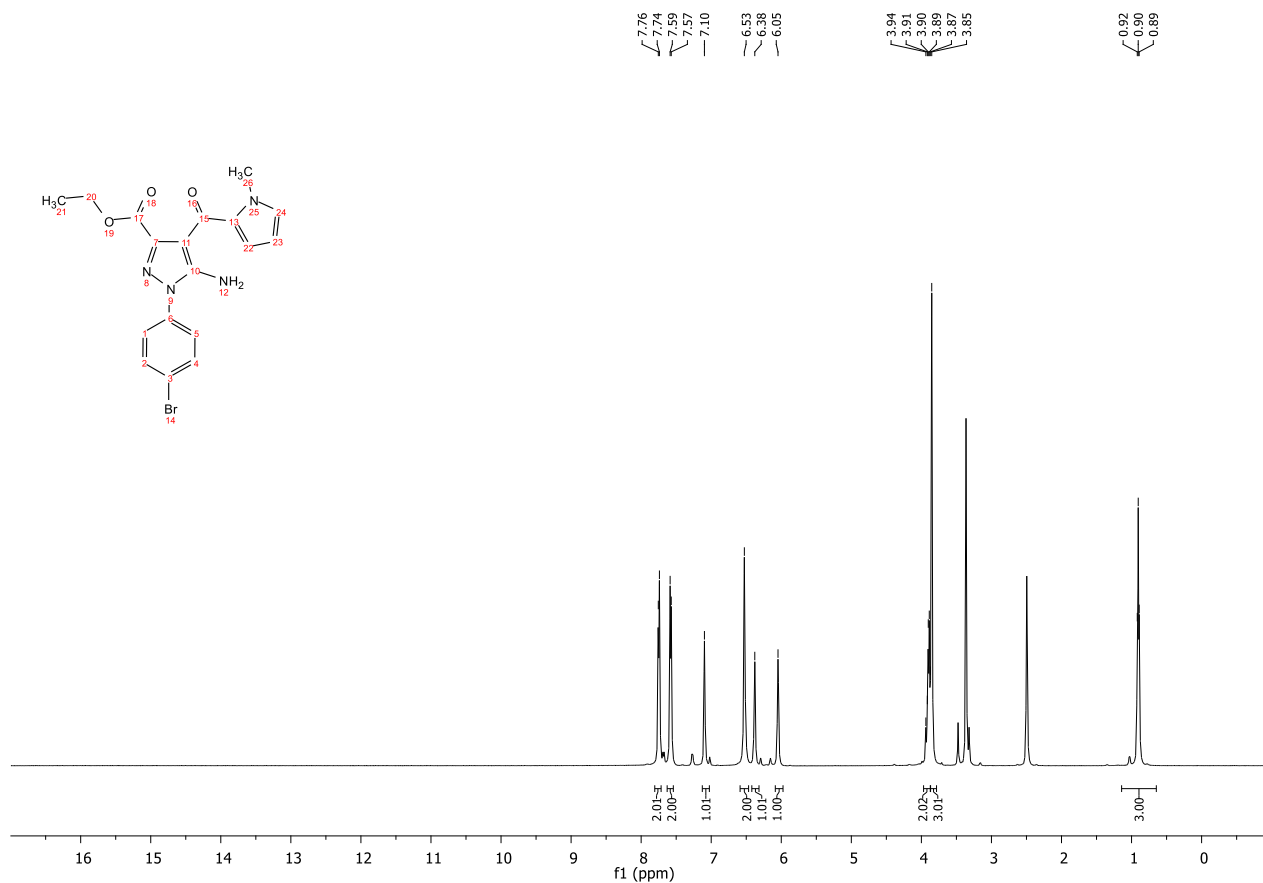

**<sup>13</sup>C NMR Ethyl 5-amino-1-(4-bromophenyl)-4-(1-methyl-1H-pyrrole-2-carbonyl)-1H-pyrazole-3-carboxylate (7c):**

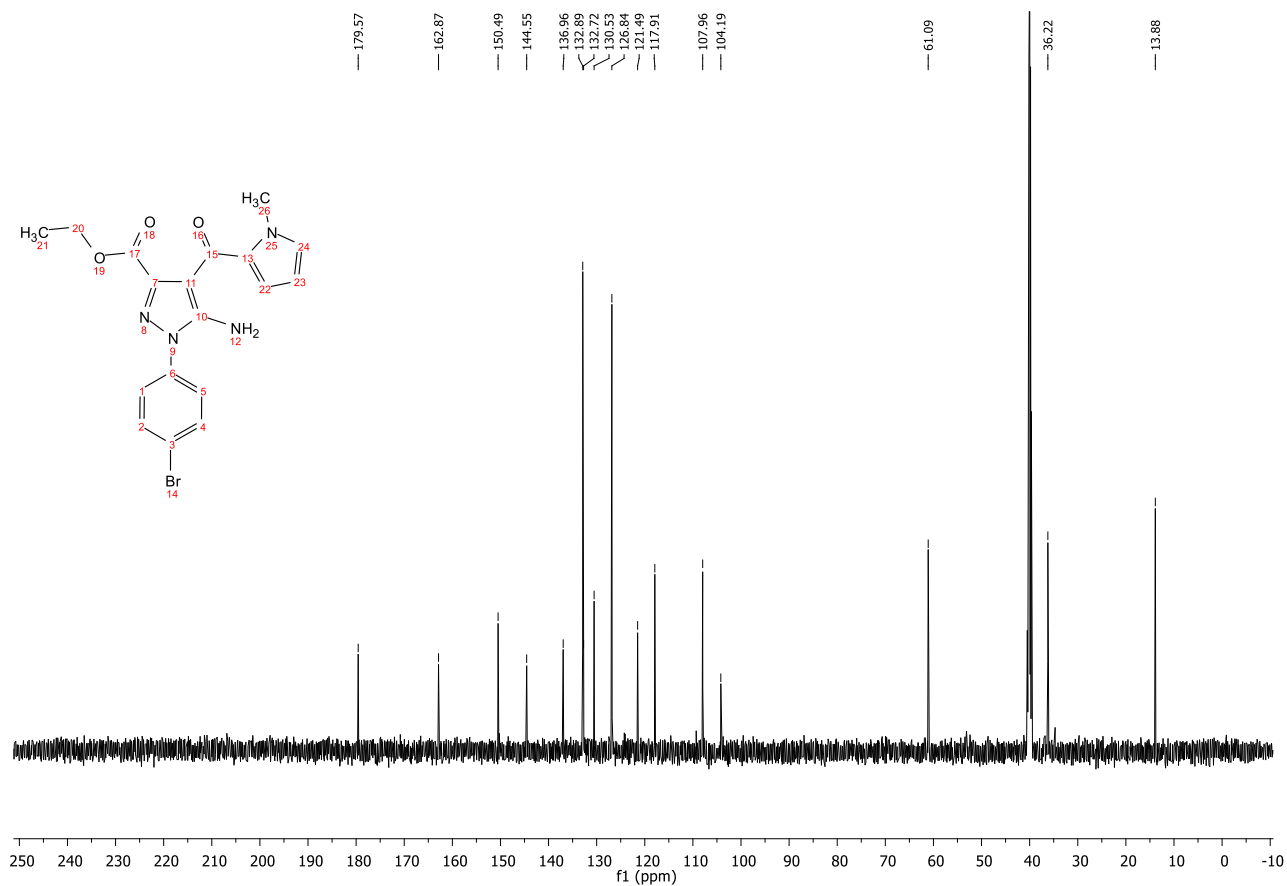

**<sup>1</sup>H NMR**      **Methyl 5-amino-4-(1*H*-indol-3-ylcarbonyl)-1-phenyl-1*H*-pyrazole-3-carboxylate (7d):**

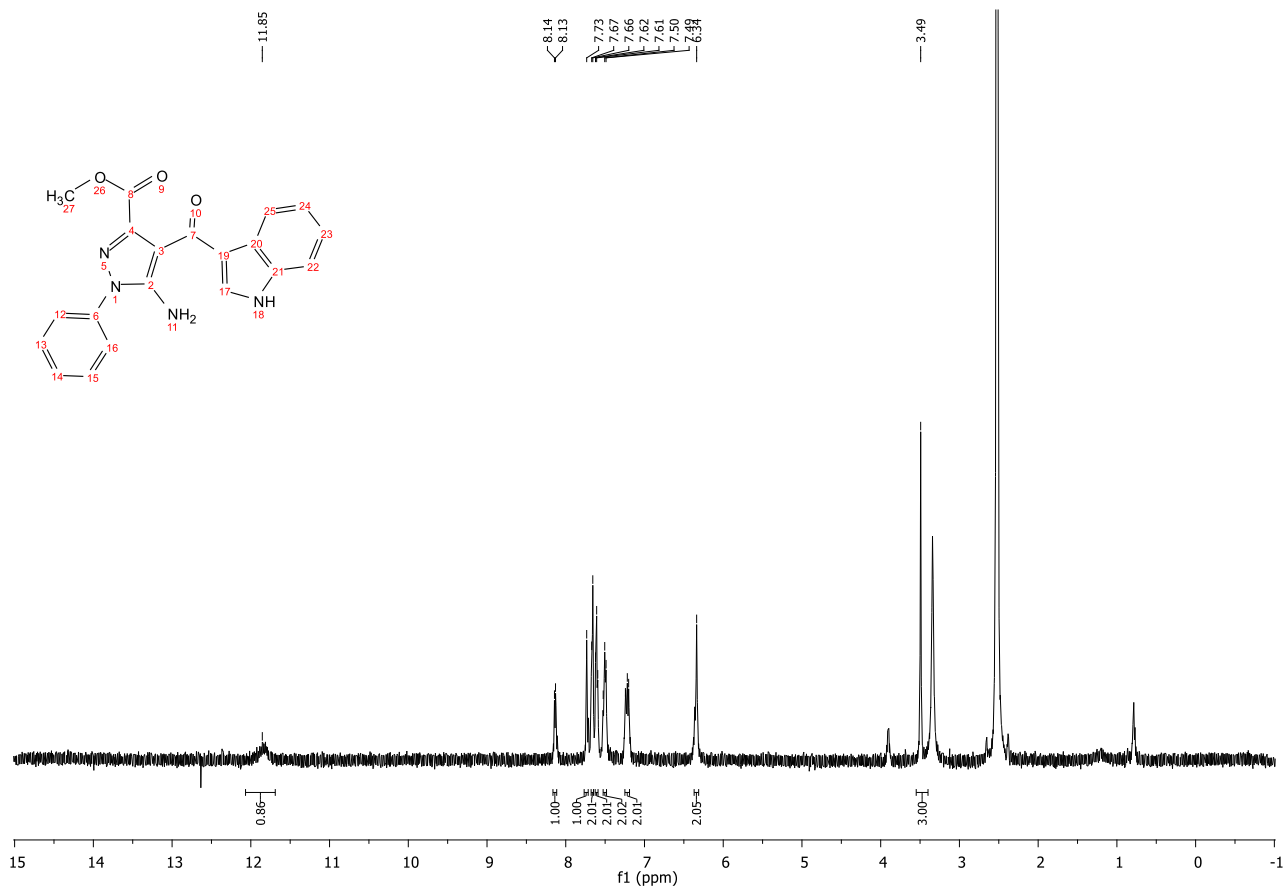

**<sup>13</sup>C NMR**      **Methyl 5-amino-4-(1*H*-indol-3-ylcarbonyl)-1-phenyl-1*H*-pyrazole-3-carboxylate (7d):**

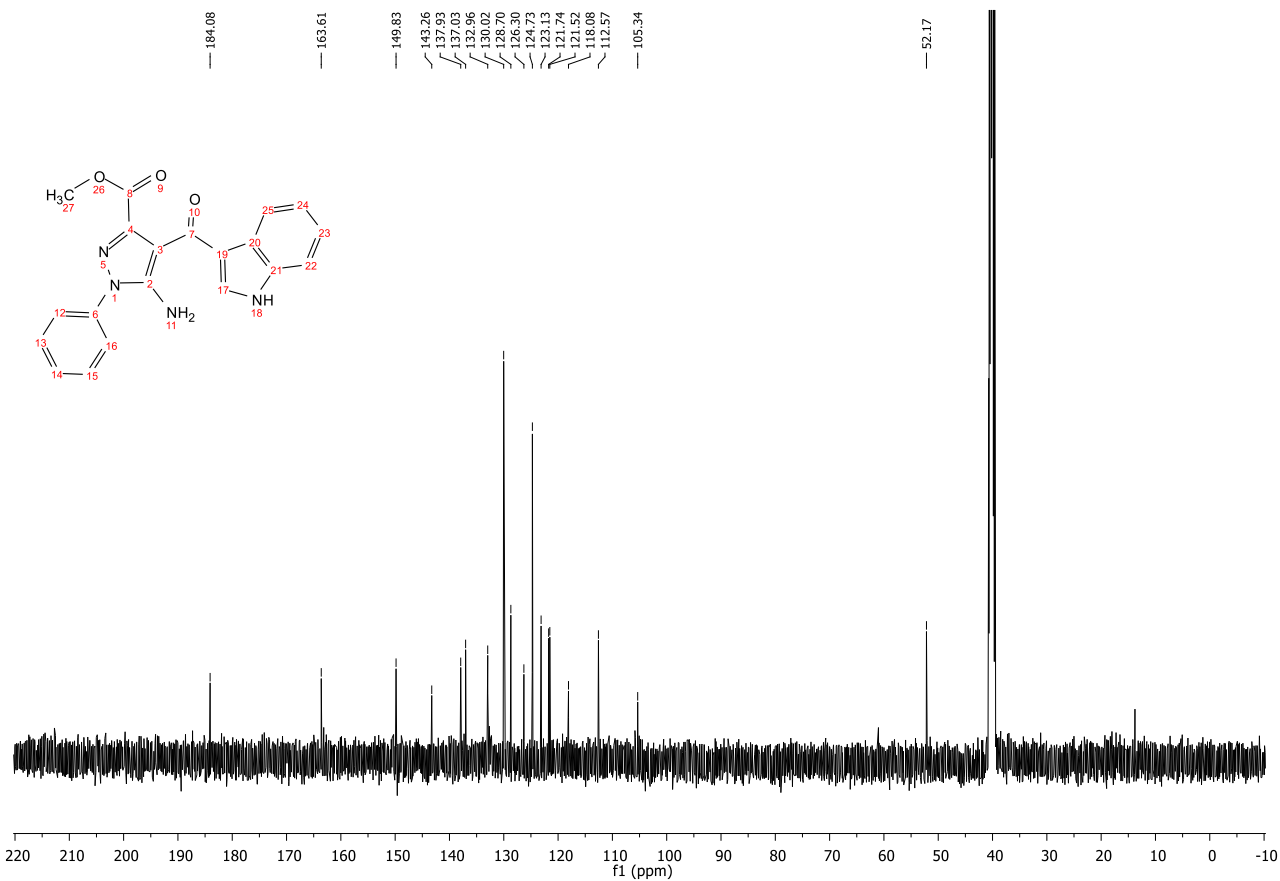

**<sup>1</sup>H NMR Ethyl 5-amino-4-(1*H*-indole-3-carbonyl)-1-(*p*-tolyl)-1*H*-pyrazole-3-carboxylate (7e):**

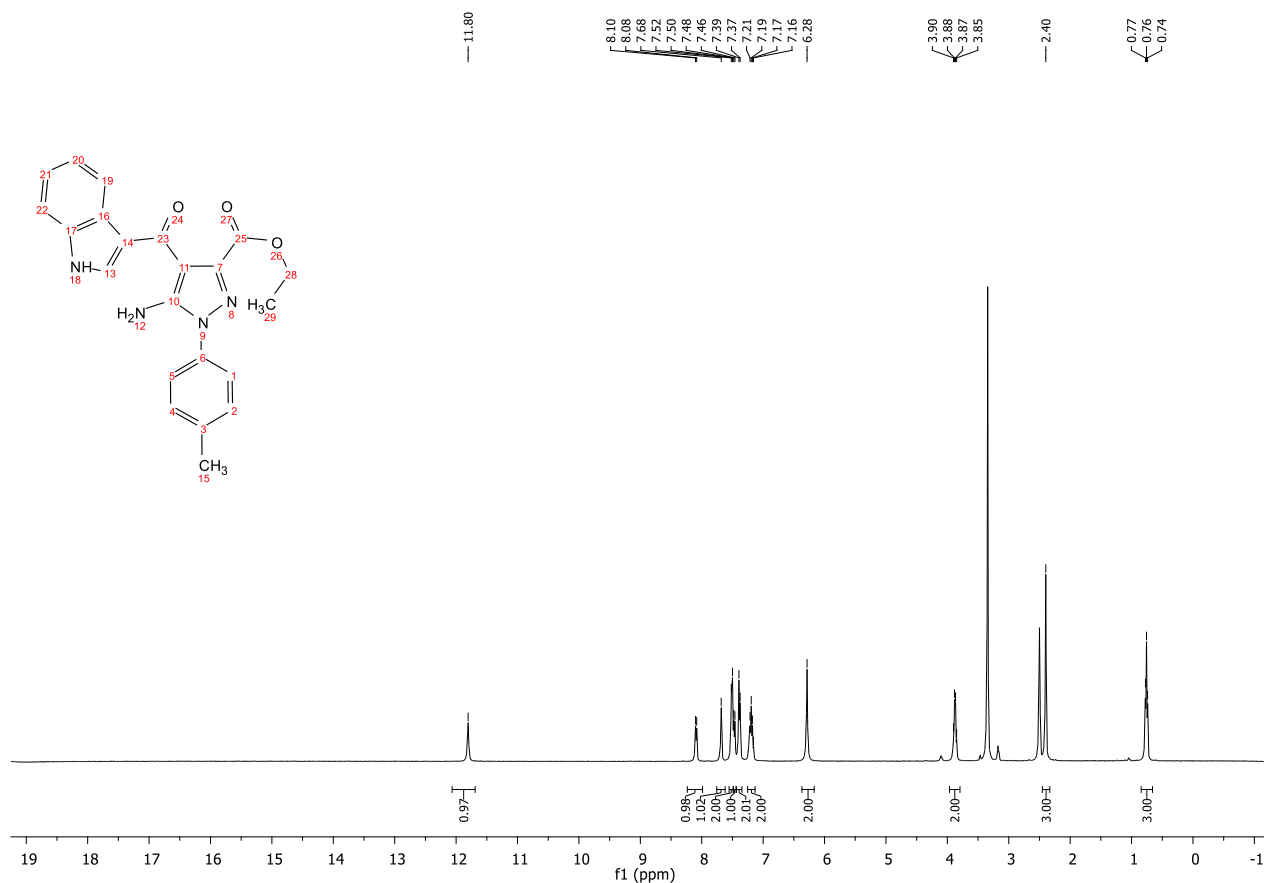

**<sup>13</sup>C NMR Ethyl 5-amino-4-(1*H*-indole-3-carbonyl)-1-(*p*-tolyl)-1*H*-pyrazole-3-carboxylate (7e):**

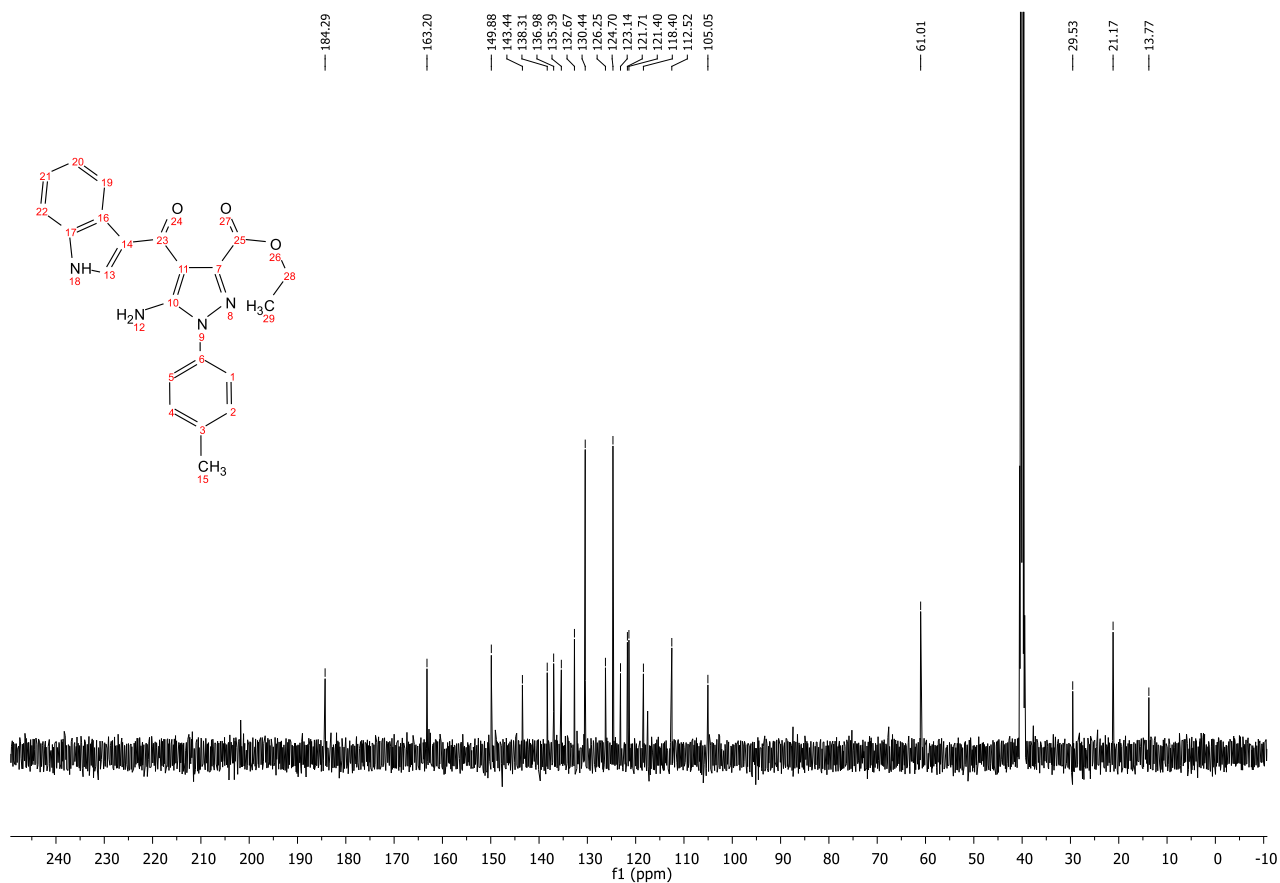

**<sup>1</sup>H NMR Ethyl 5-amino-1-(4-chlorophenyl)-4-(1H-indole-3-carbonyl)-1H-pyrazole-3-carboxylate (7f):**

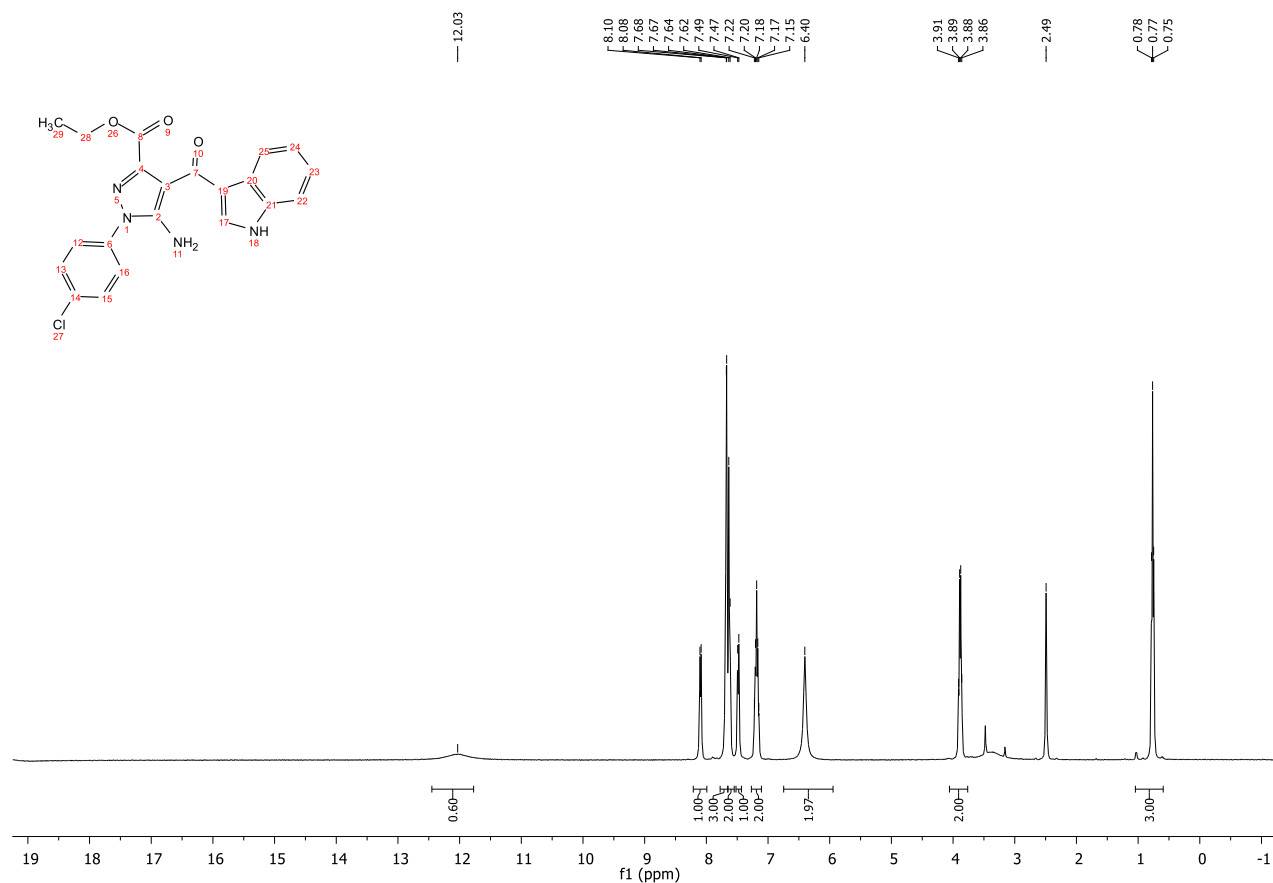

**<sup>13</sup>C NMR Ethyl 5-amino-1-(4-chlorophenyl)-4-(1H-indole-3-carbonyl)-1H-pyrazole-3-carboxylate (7f):**

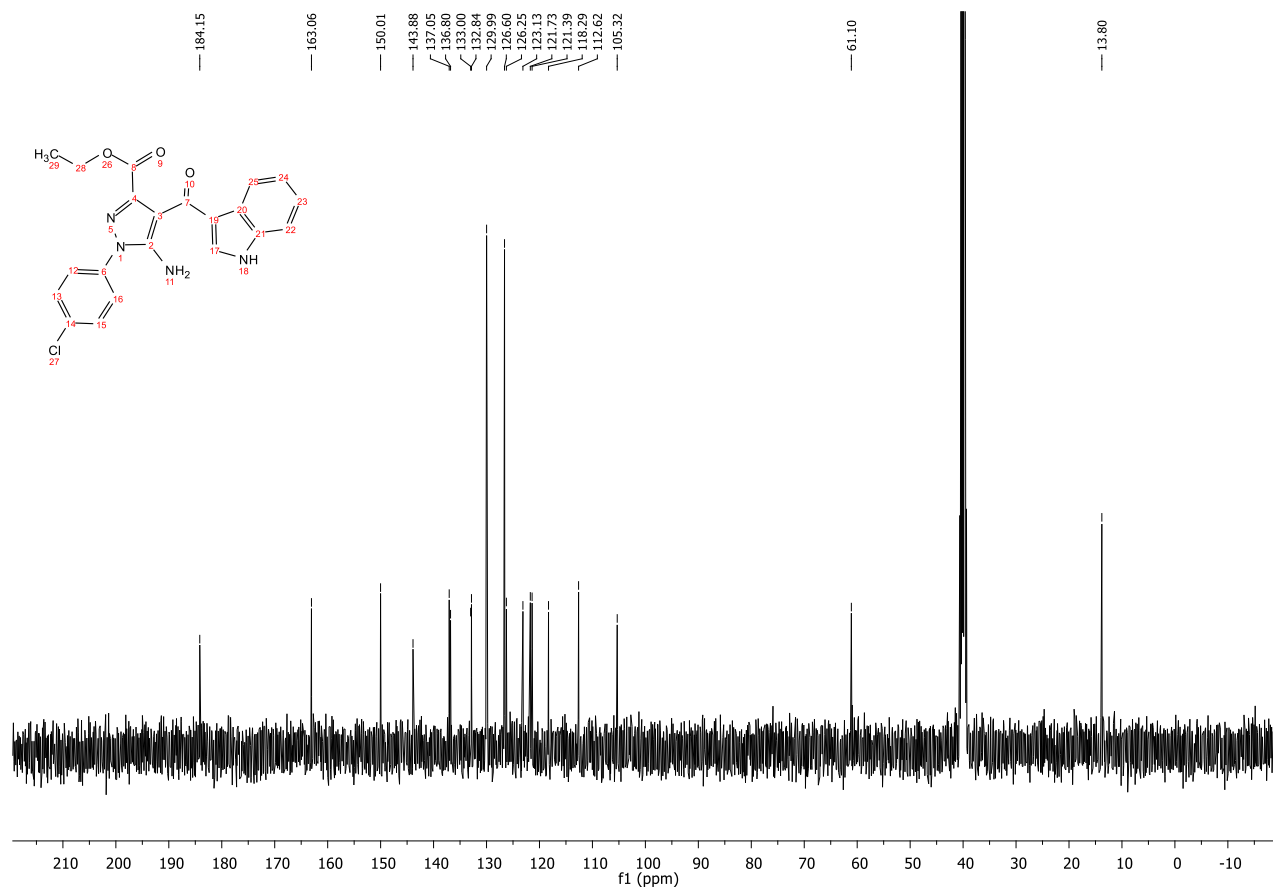

**<sup>1</sup>H NMR Ethyl 5-amino-1-(4-bromophenyl)-4-(1H-indole-3-carbonyl)-1H-pyrazole-3-carboxylate (7g):**

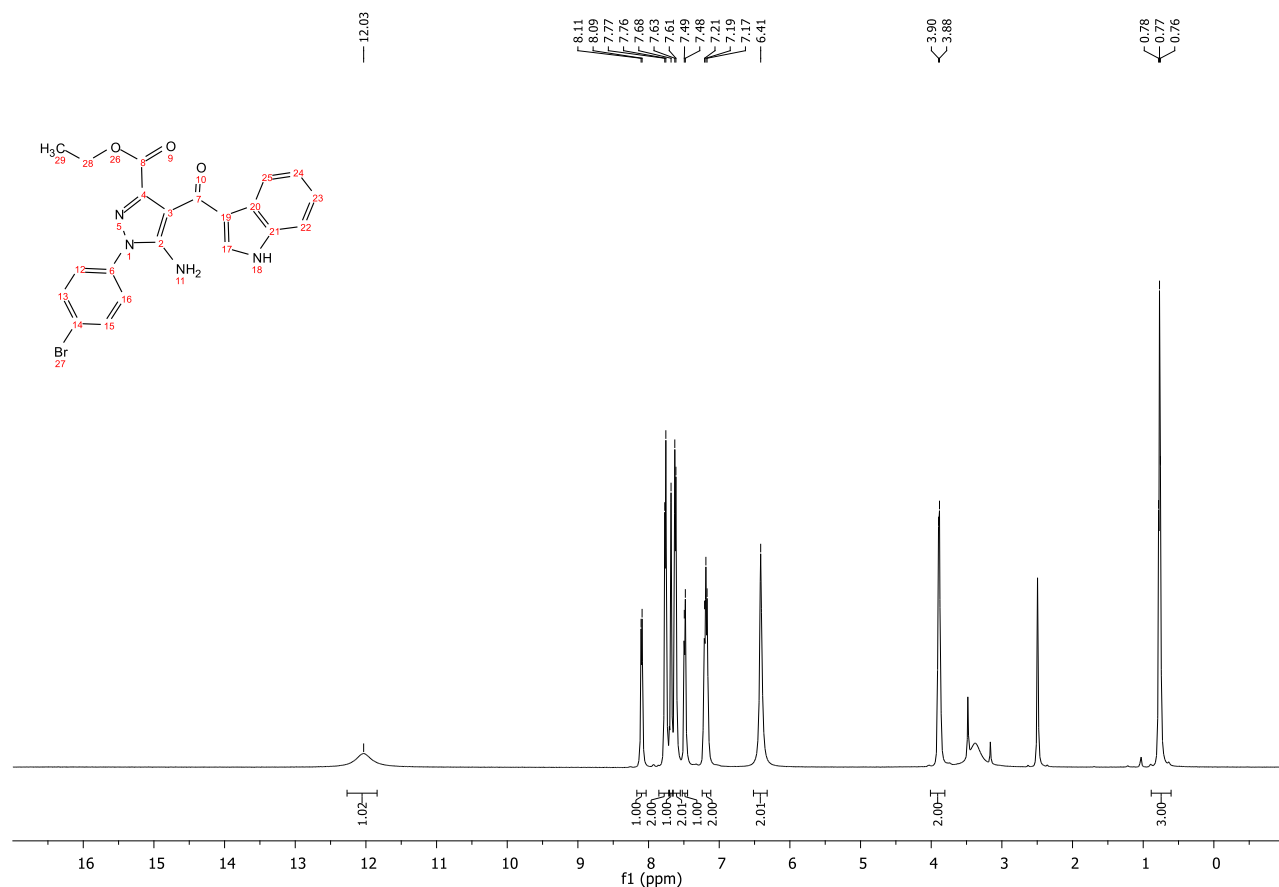

**<sup>13</sup>C NMR Ethyl 5-amino-1-(4-bromophenyl)-4-(1H-indole-3-carbonyl)-1H-pyrazole-3-carboxylate (7g):**

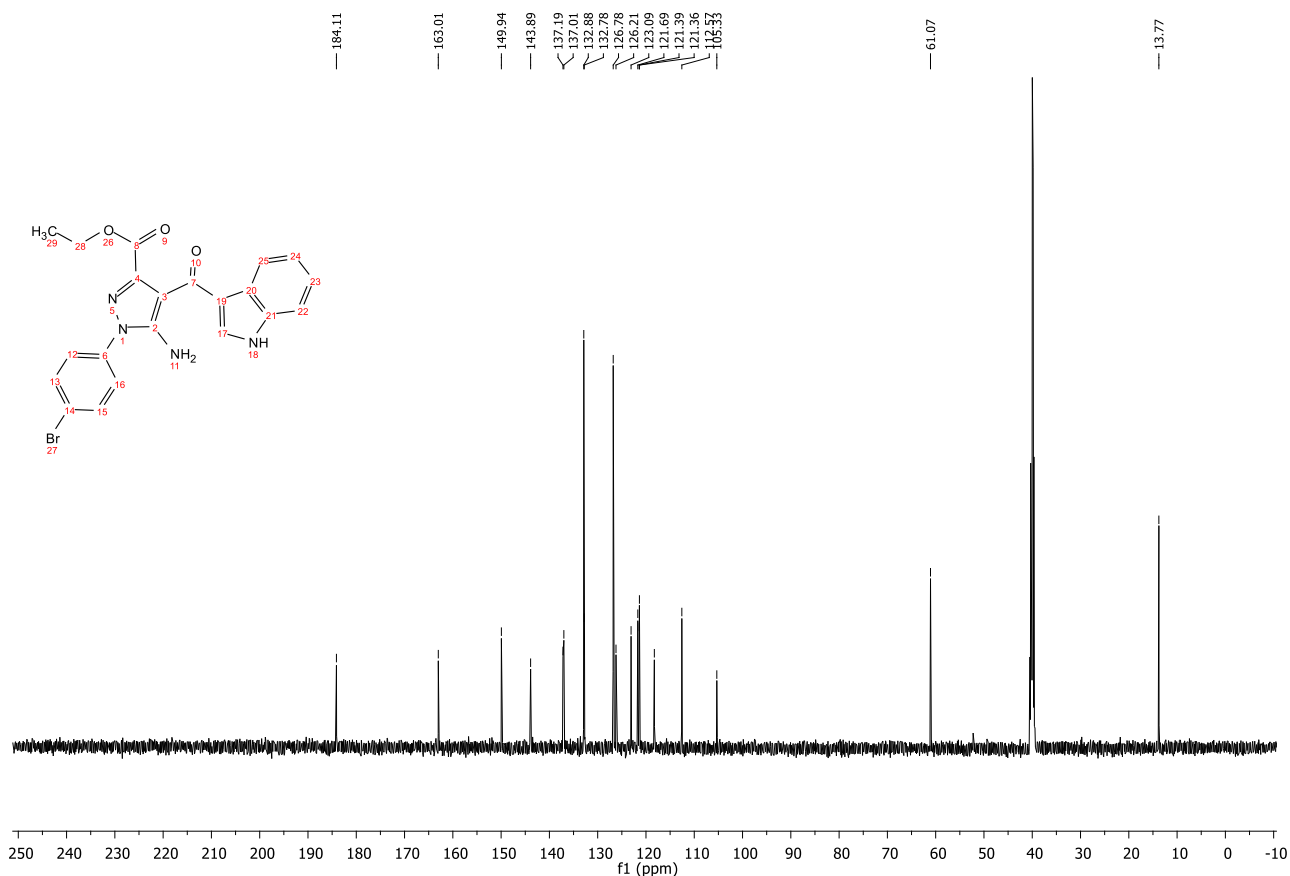

**<sup>1</sup>H NMR**      **5-Amino-1-(4-fluorophenyl)-4-(1H-indole-3-carbonyl)-1H-pyrazole-3-carboxylic acid (7h):**

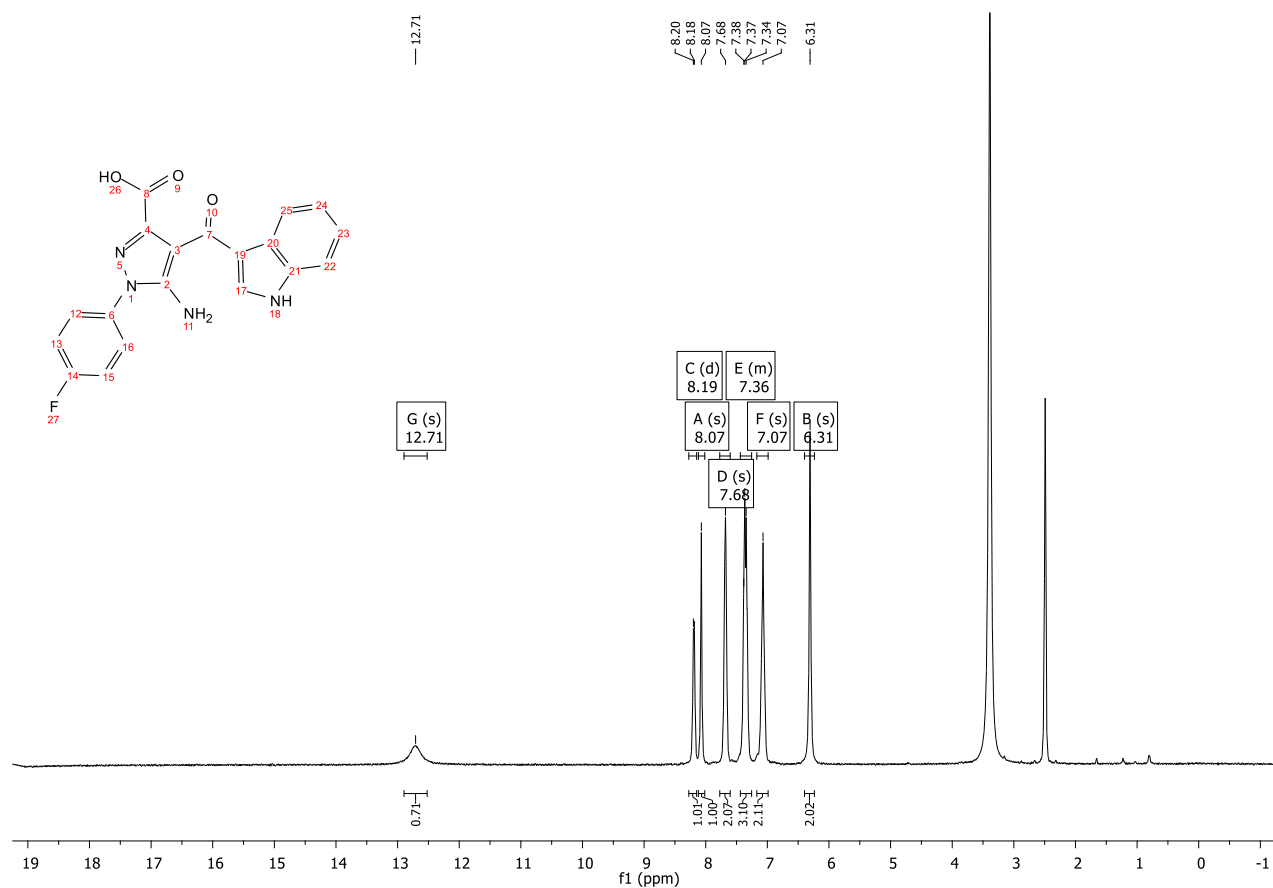

**<sup>13</sup>C NMR**      **5-Amino-1-(4-fluorophenyl)-4-(1H-indole-3-carbonyl)-1H-pyrazole-3-carboxylic acid (7h):**

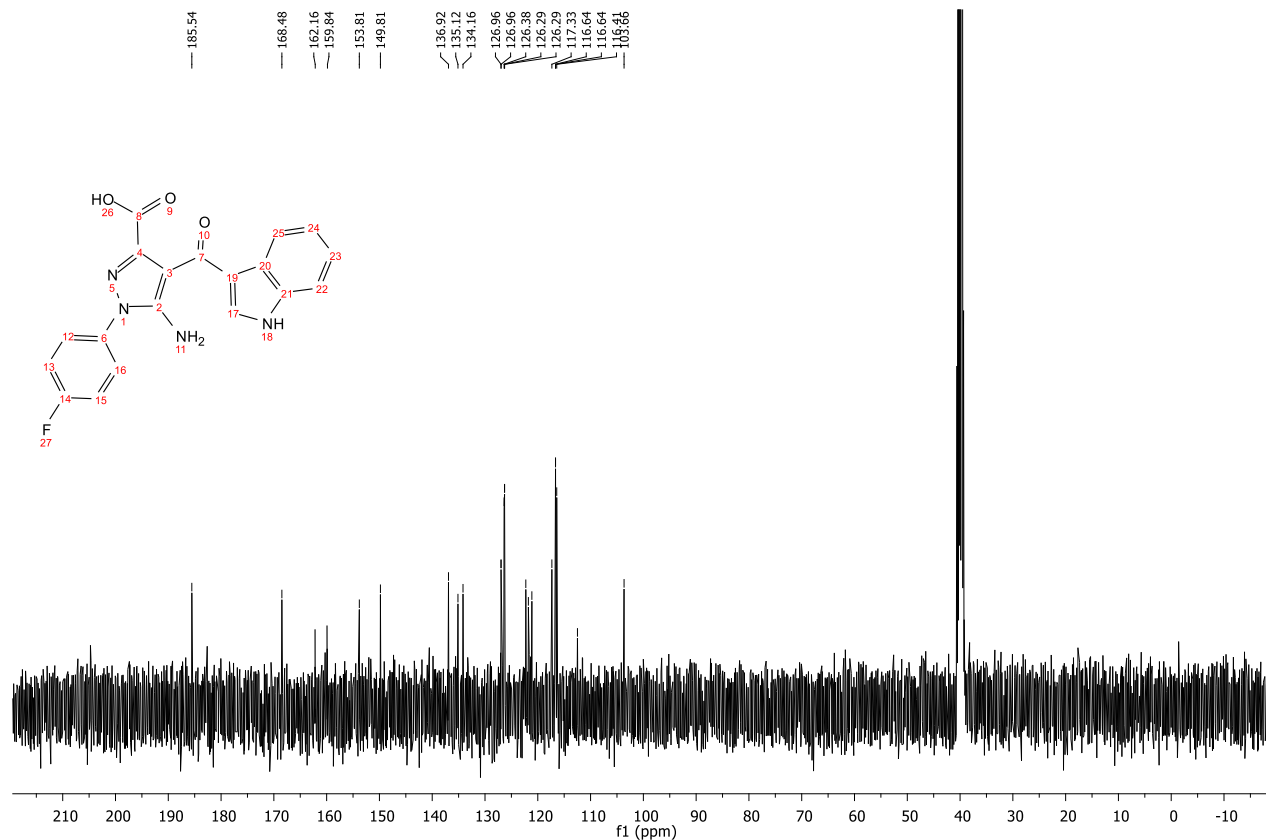

**<sup>1</sup>H NMR**  
**(5a):**

**4-(3-(4-Fluorophenyl)-1,2,4-oxadiazol-5-yl)-1-phenyl-1H-1,2,3-triazol-5-amine**

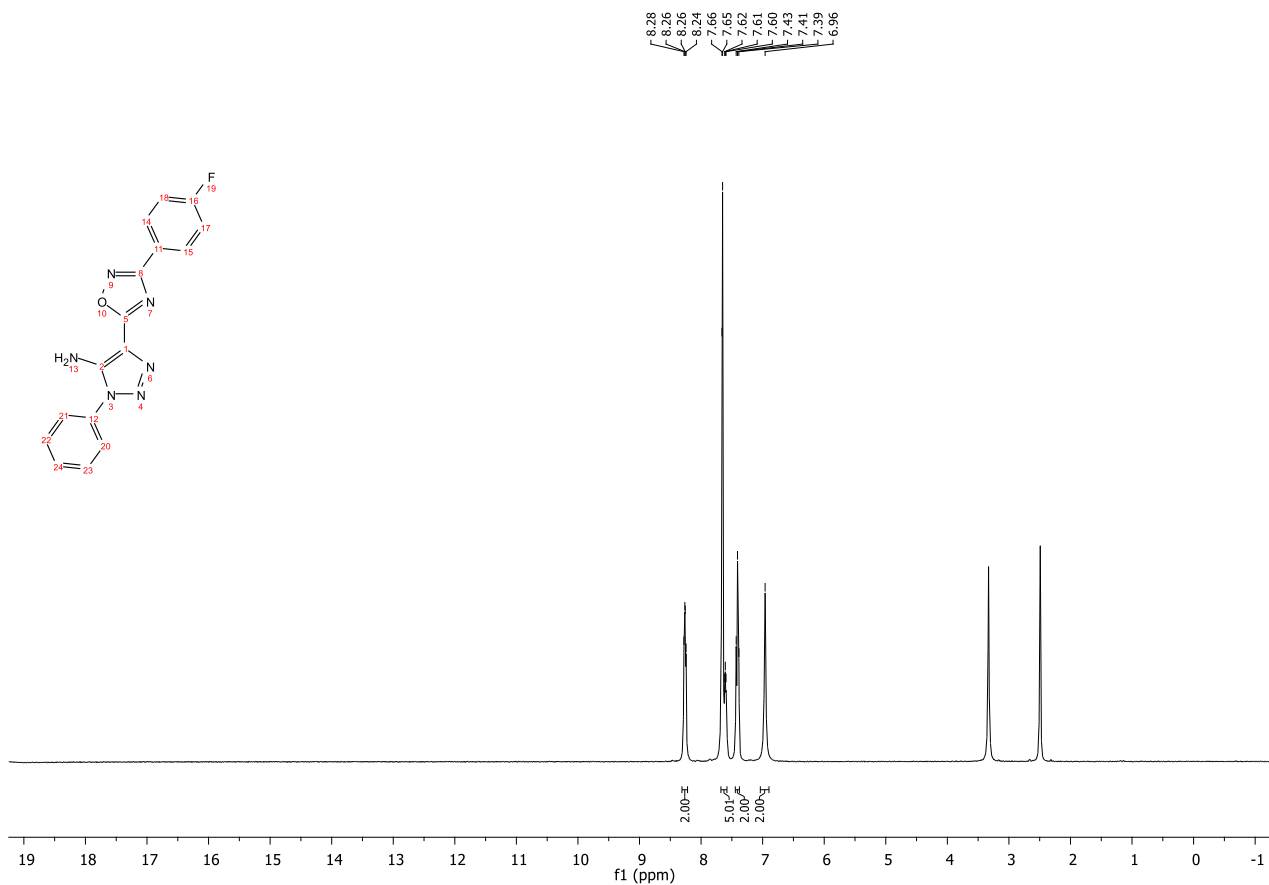

**<sup>13</sup>C NMR**  
**(5a):**

**4-(3-(4-Fluorophenyl)-1,2,4-oxadiazol-5-yl)-1-phenyl-1H-1,2,3-triazol-5-amine**

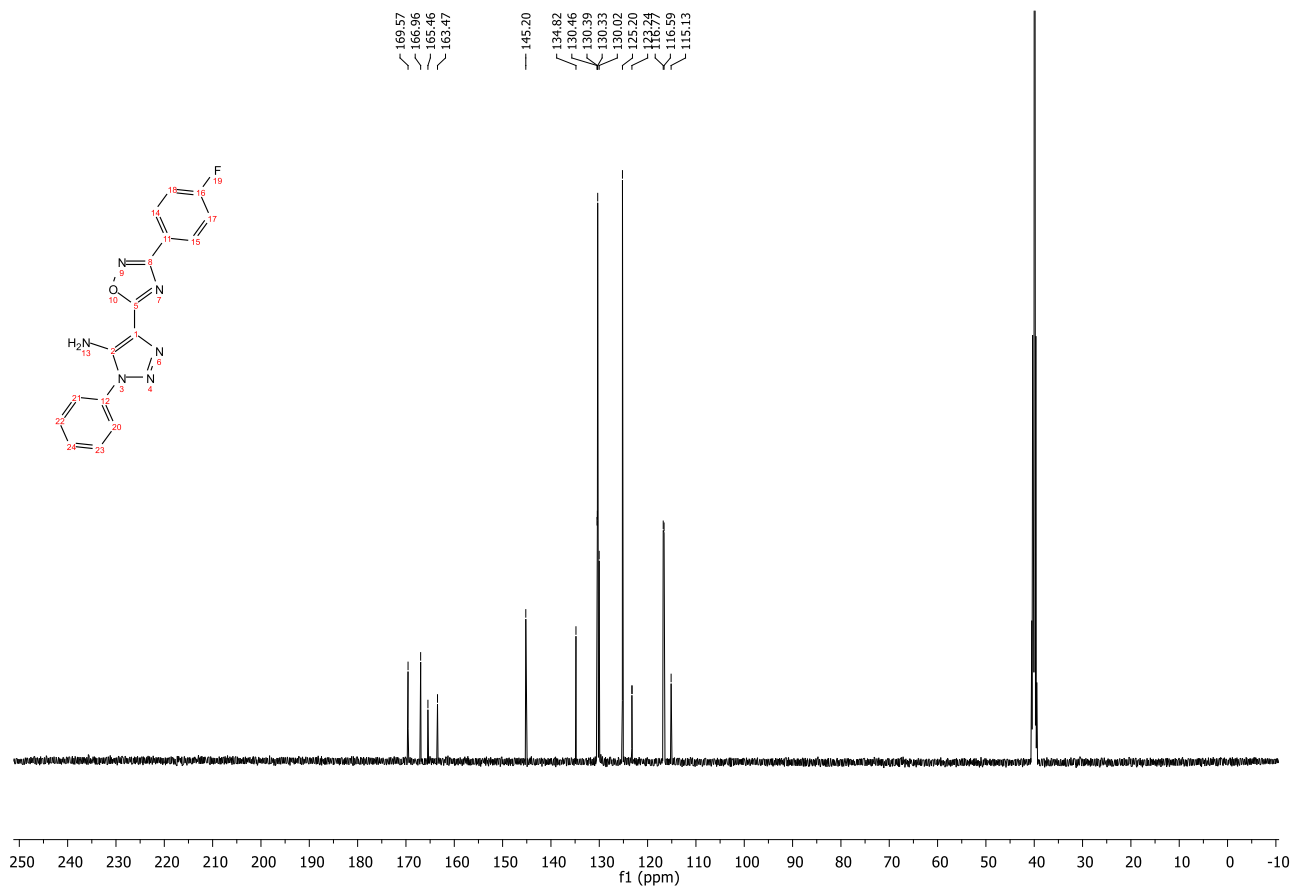

**<sup>1</sup>H NMR**  
**(5b):**

**4-(3-(4-Chlorophenyl)-1,2,4-oxadiazol-5-yl)-1-m-tolyl-1H-1,2,3-triazol-5-amine**

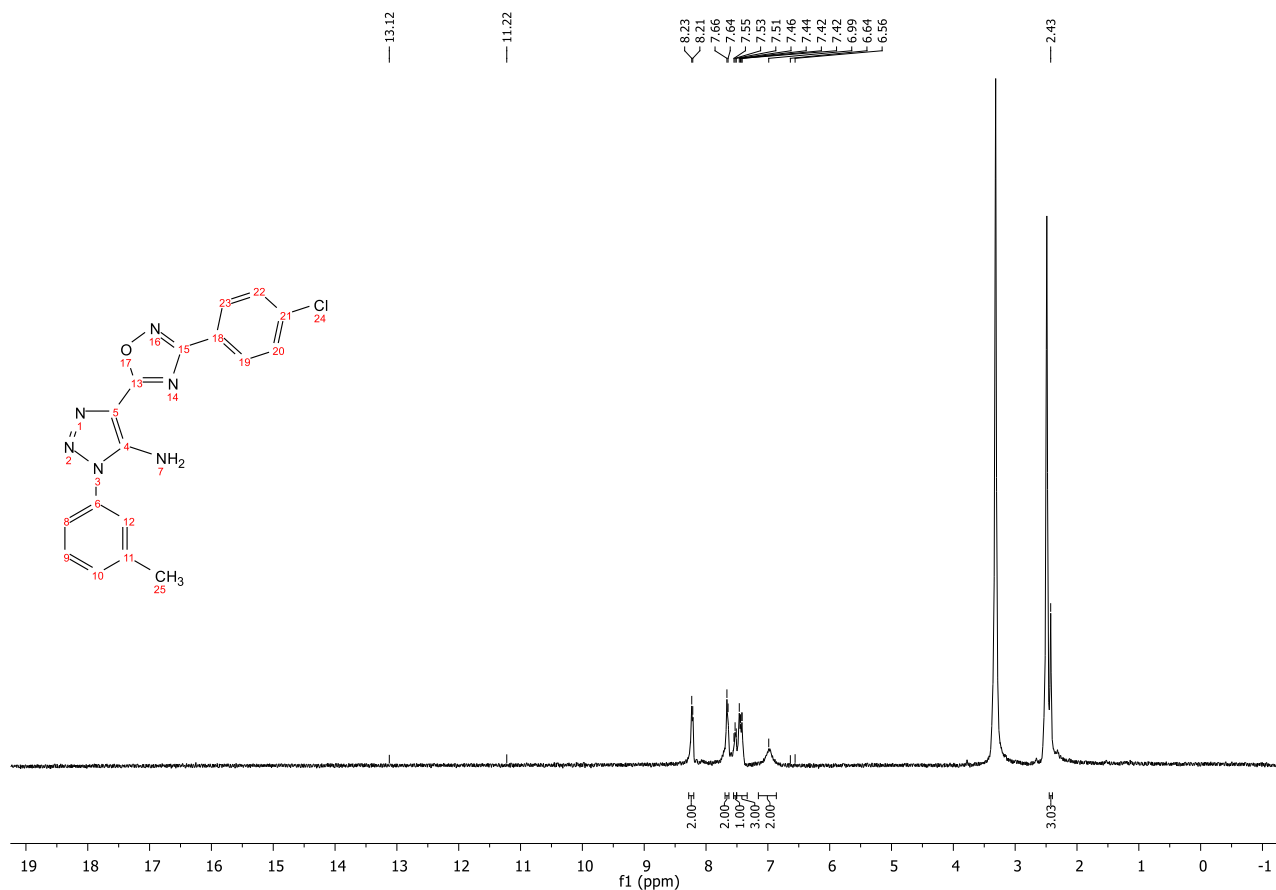

**<sup>13</sup>C NMR**  
**(5b):**

**4-(3-(4-Chlorophenyl)-1,2,4-oxadiazol-5-yl)-1-m-tolyl-1H-1,2,3-triazol-5-amine**

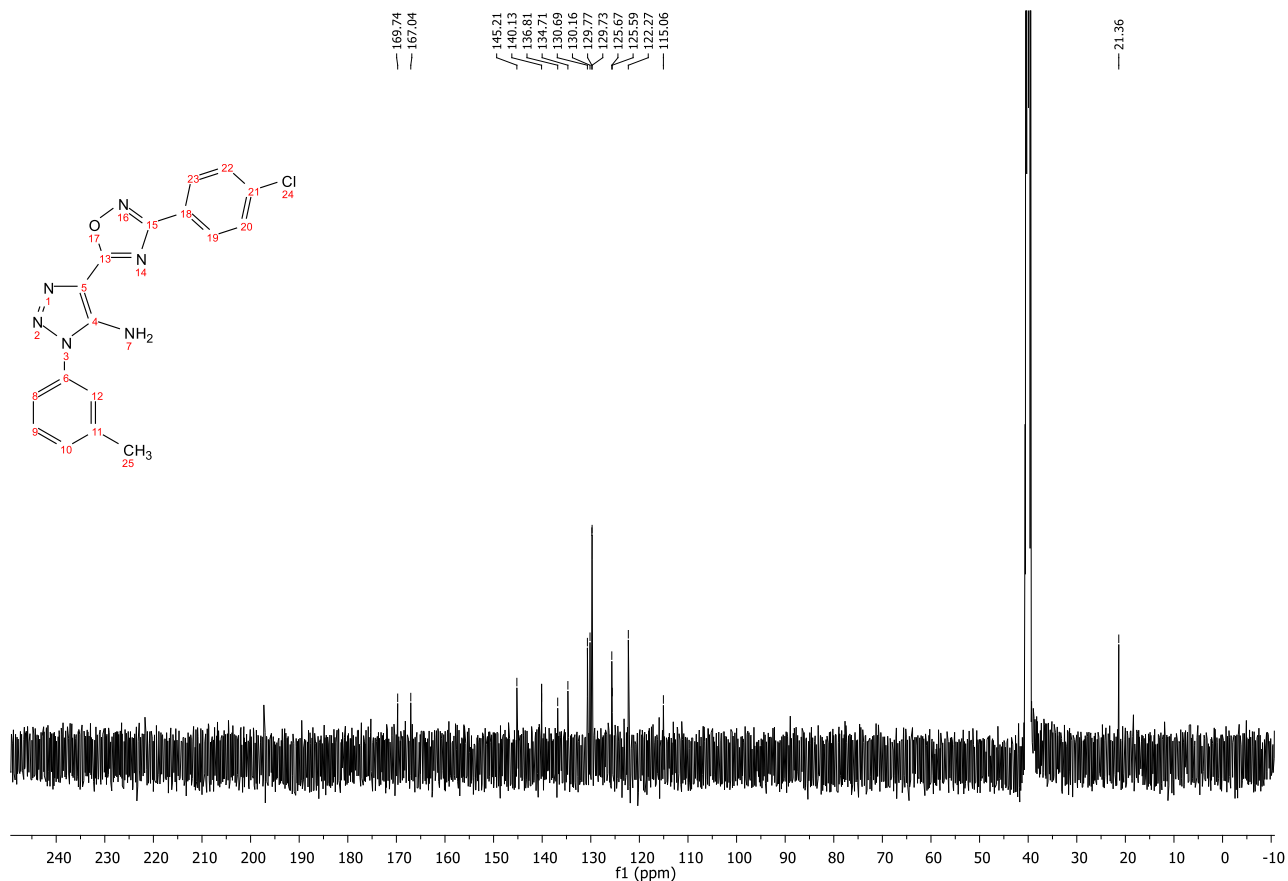



**<sup>1</sup>H NMR**  
**(5c):**

**1-(4-Fluorophenyl)-4-(3-o-tolyl-1,2,4-oxadiazol-5-yl)-1H-1,2,3-triazol-5-amine**

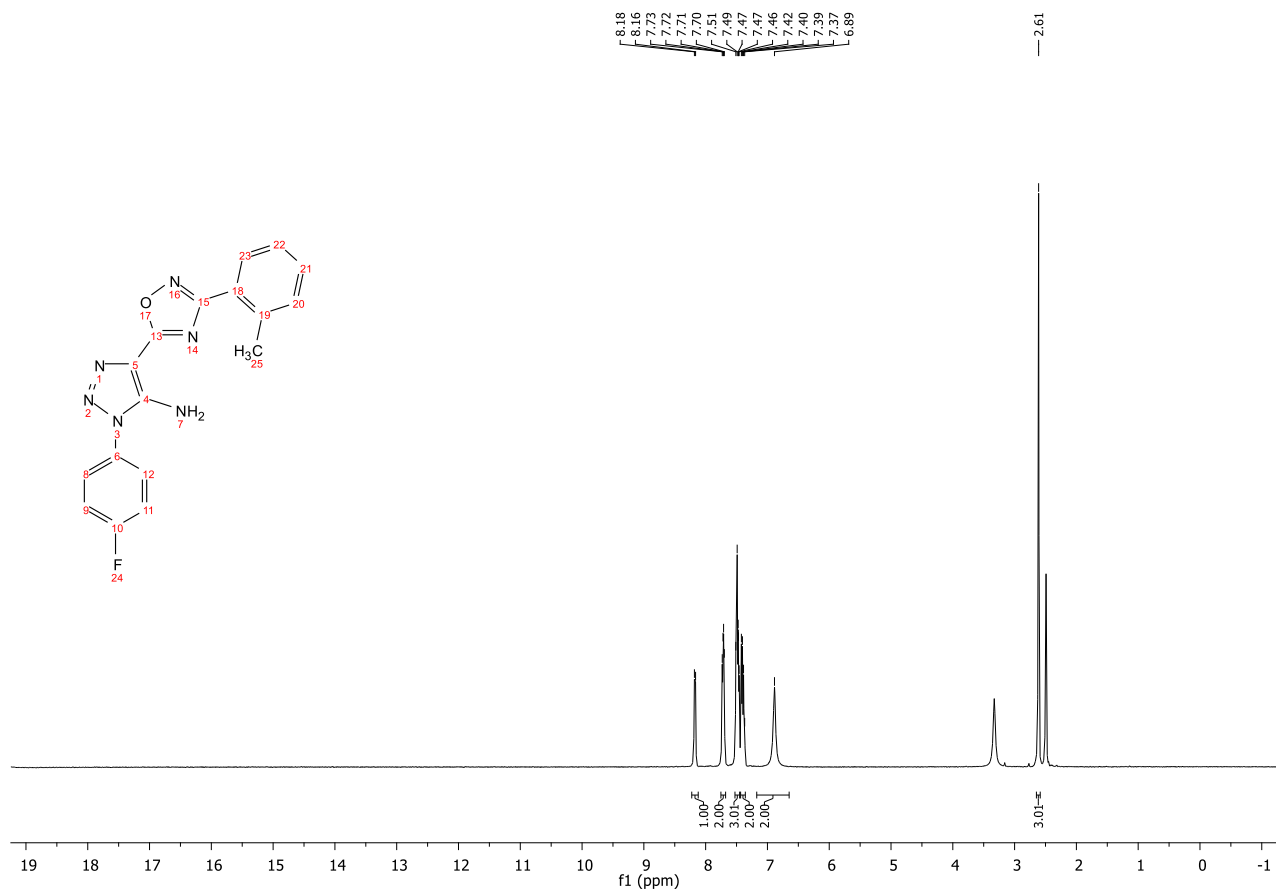

**<sup>13</sup>C NMR**  
**(5c):**

**1-(4-Fluorophenyl)-4-(3-o-tolyl-1,2,4-oxadiazol-5-yl)-1H-1,2,3-triazol-5-amine**

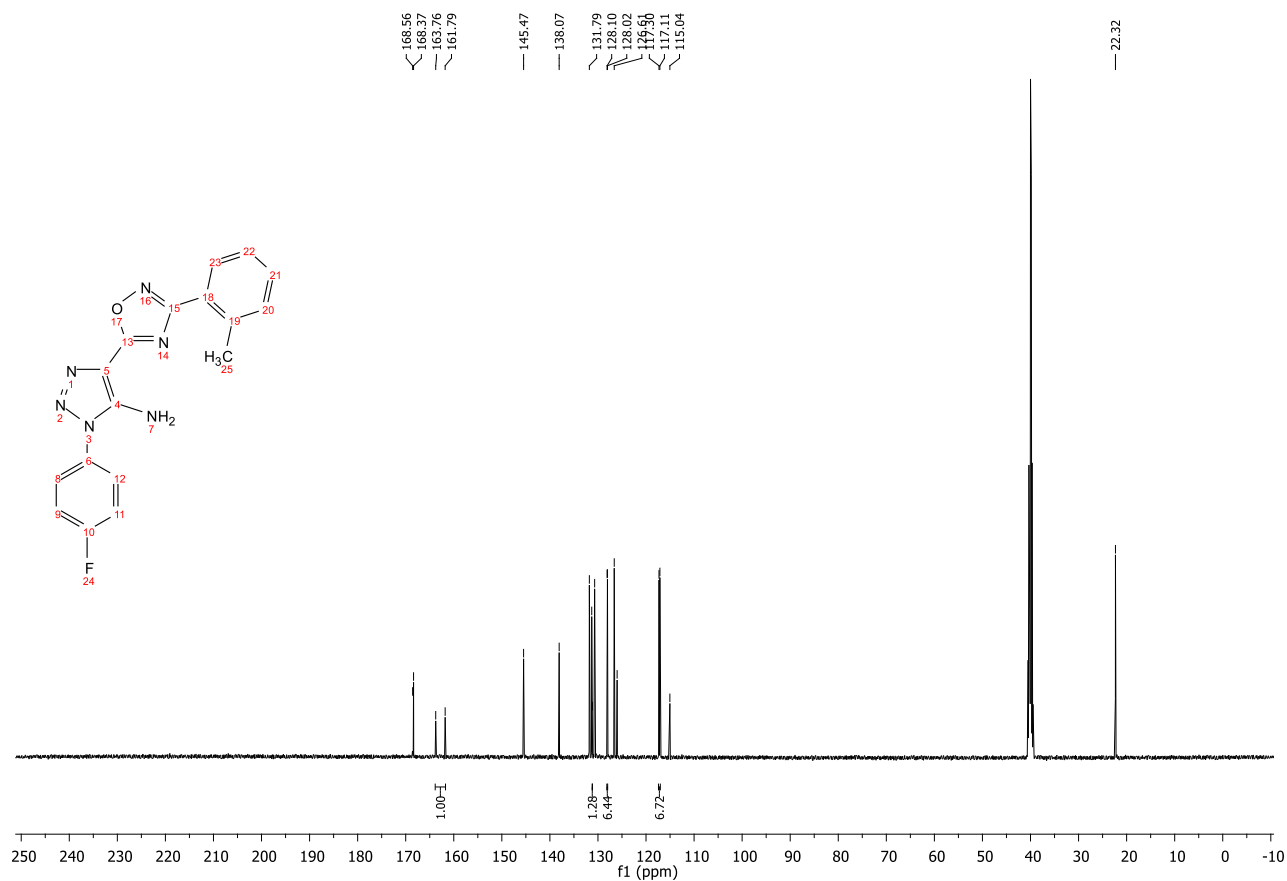

**<sup>1</sup>H NMR 1-(4-Chlorophenyl)-4-(3-(4-fluorophenyl)-1,2,4-oxadiazol-5-yl)-1H-1,2,3-triazol-5-amine (5d):**

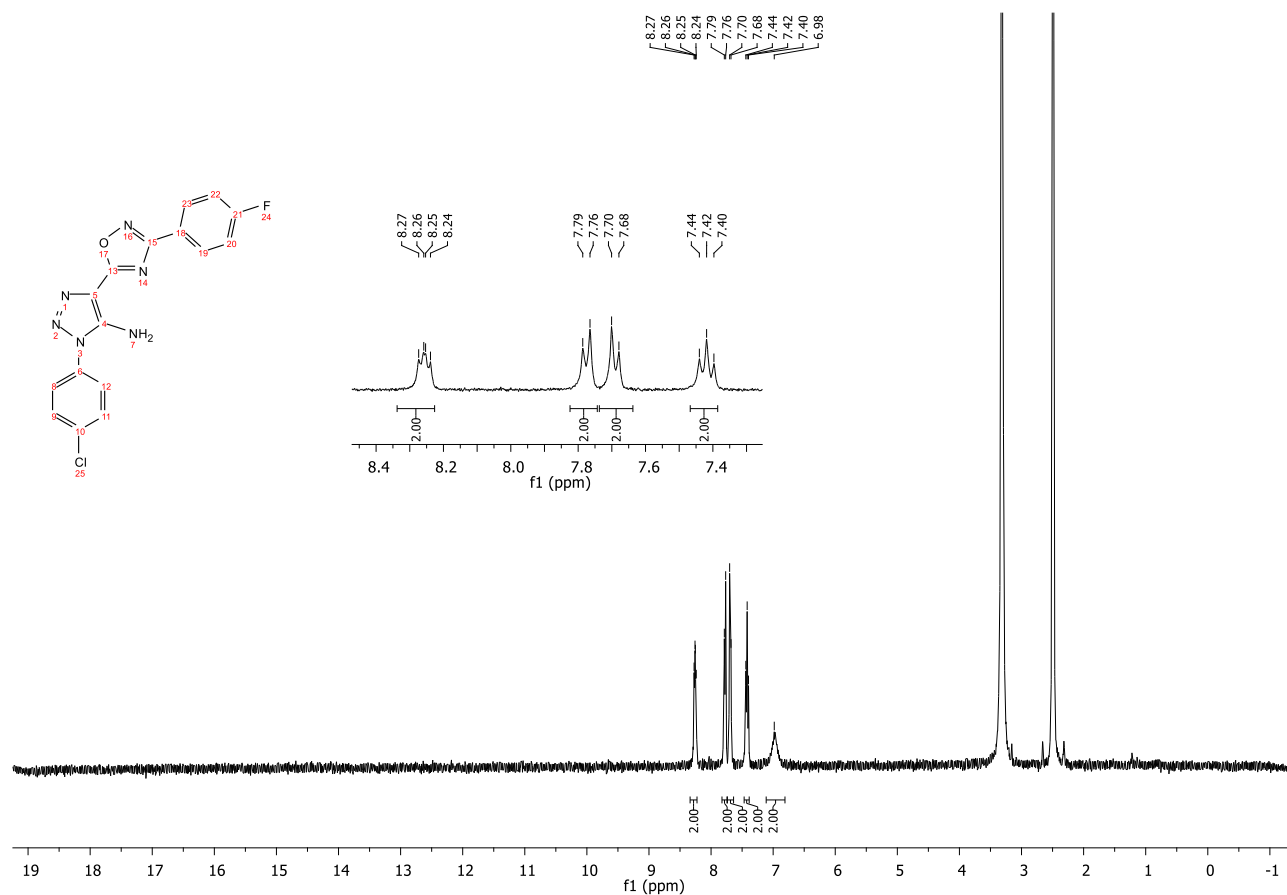

**<sup>13</sup>C NMR 1-(4-Chlorophenyl)-4-(3-(4-fluorophenyl)-1,2,4-oxadiazol-5-yl)-1H-1,2,3-triazol-5-amine (5d):**

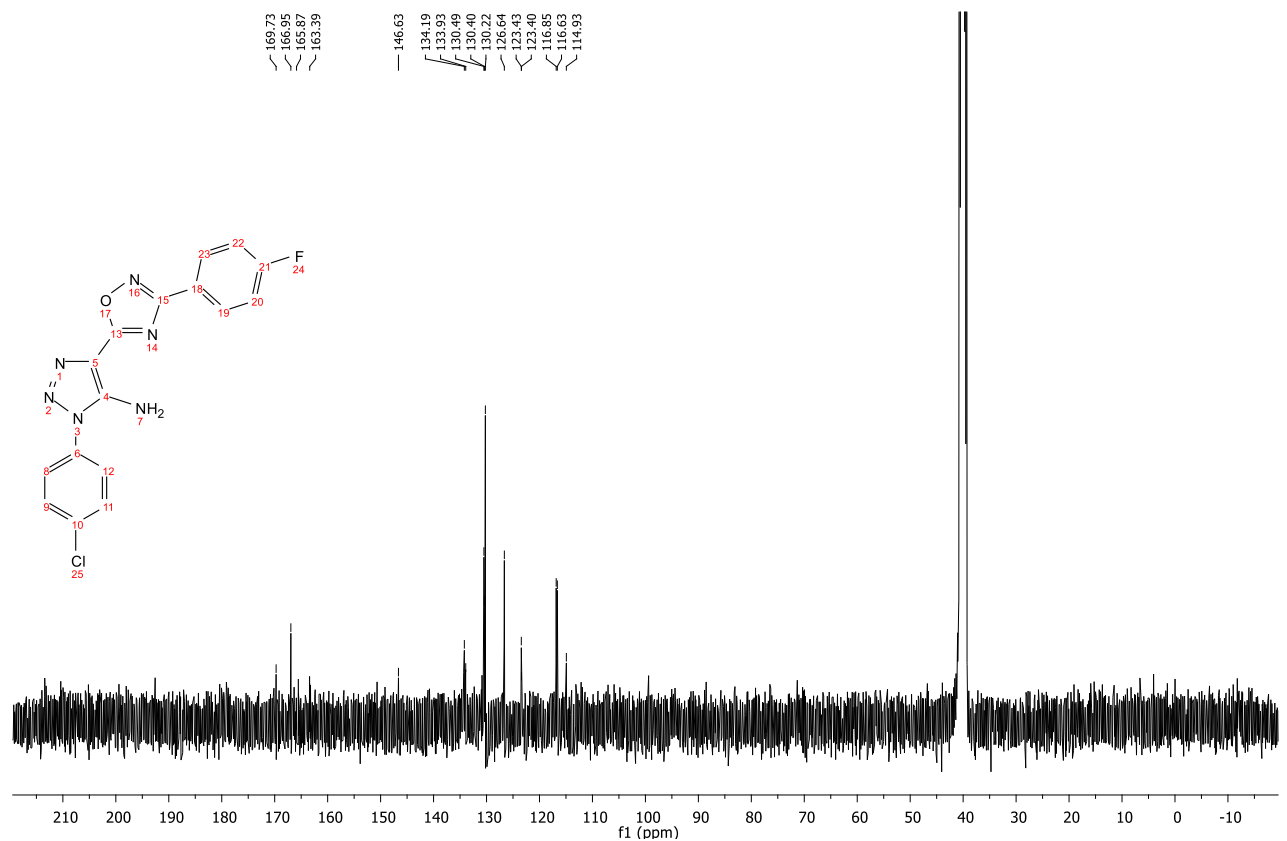

**<sup>1</sup>H NMR** 4-(3-(2-Chlorophenyl)-1,2,4-oxadiazol-5-yl)-1-(2,4-dichlorophenyl)-1H-1,2,3-triazol-5-amine (5e):

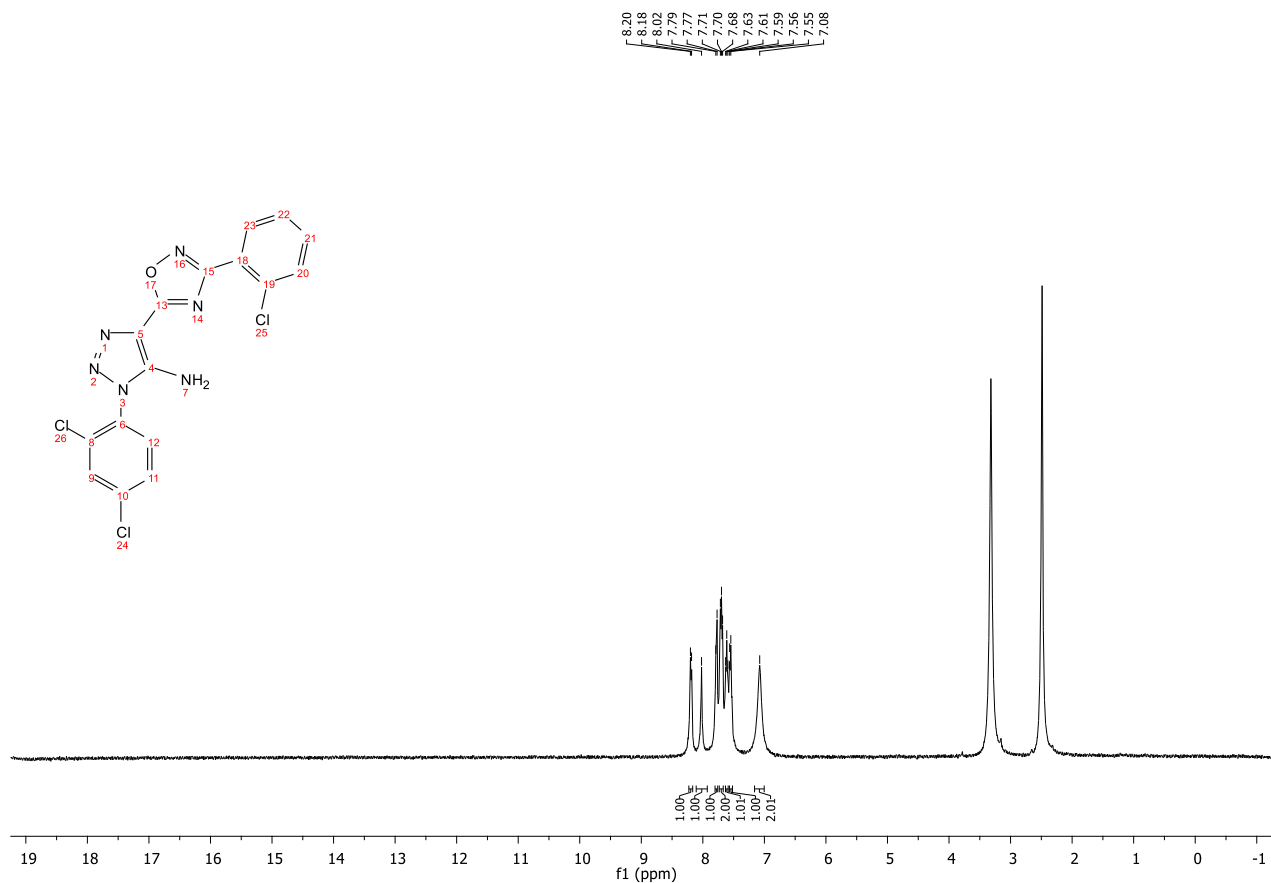

**<sup>13</sup>C NMR** 4-(3-(2-Chlorophenyl)-1,2,4-oxadiazol-5-yl)-1-(2,4-dichlorophenyl)-1H-1,2,3-triazol-5-amine (5e):

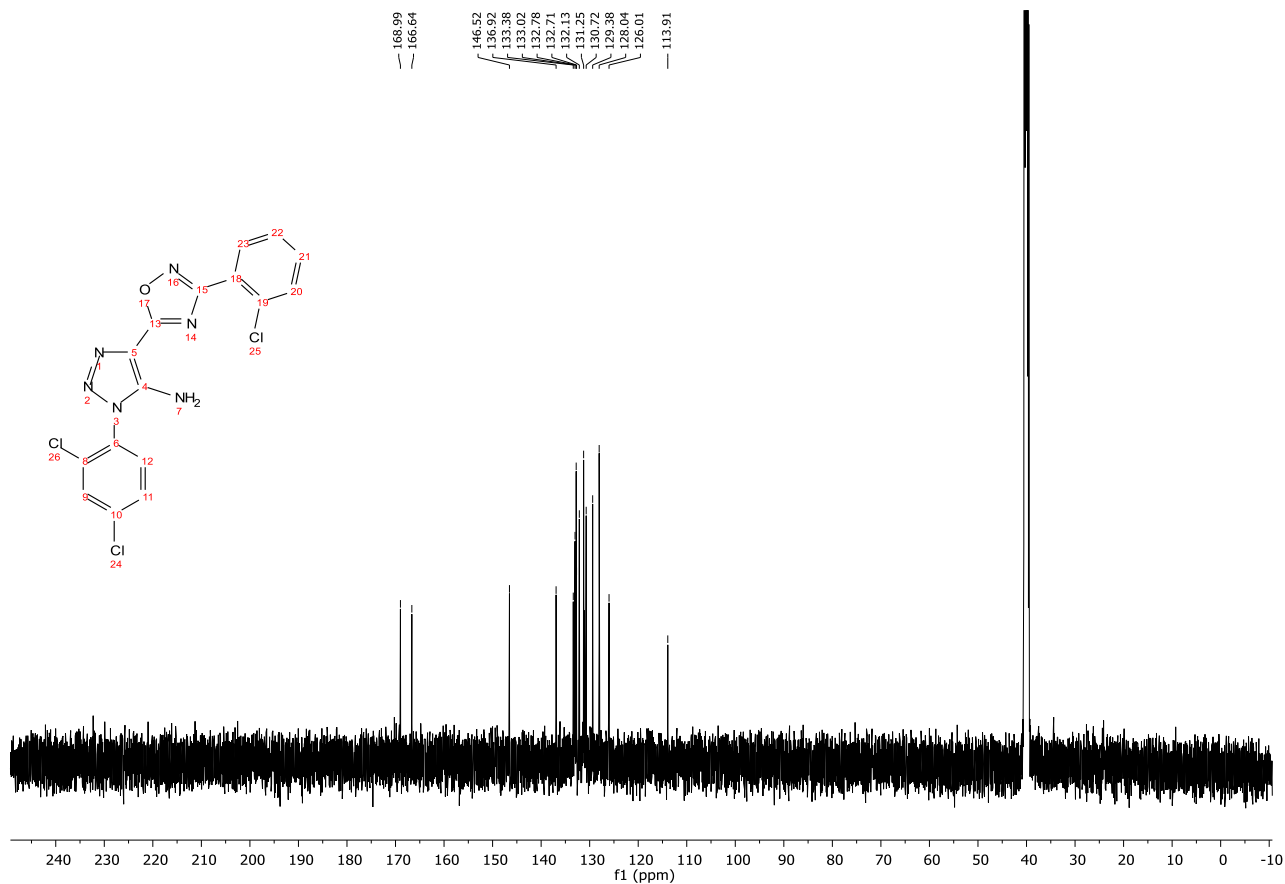

Supplement: d0ra01417f1.pdf [file d0ra01417f1.pdf]
